# Supplementary material
Source: PubMed Central journal article supplement (PMC5707145)
Supplement: jci-127-81870-s001.pdf [file jci-127-81870-s001.pdf]

**Supplemental Data for Toischer et al., “Cardiomyocyte proliferation prevents failure in pressure but not volume overload”.**

**Contents:**

- Page 3: Supplemental Figure 1 - Echocardiographic recordings from a sham, a WT-TAC and a D2-TAC-operated mouse 3 and 10 weeks after operation.
- Page 4: Supplemental Figure 2 - Septum thickness, fractional shortening and left ventricular end-diastolic diameter from sham, WT-TAC and D2-TAC-operated mice 1, 3 and 10 weeks after operation.
- Page 5: Supplemental Figure 3 - Examples of phosphorylation of CaMKII Western blot analyses of WT and D2 mice subjected to sham or TAC surgery.
- Page 6: Supplemental Figure 4 – Perivascular Fibrosis in TAC.
- Page 7: Supplemental Figure 5 - Capillary density in TAC.
- Page 8: Supplemental Figure 6 – Impact of Shunt on cardiomyocyte cell cycle activity and cell dimensions.
- Page 9: Supplemental Figure 7 - Increases in cardiac mass in sham operated D2 mice occur largely after 9 weeks of age.
- Page 10: Supplemental Figure 8 - Pressure gradients of WT and D2 mice subjected to sham or TAC surgery.
- Page 11: Supplemental Figure 9 - Pressure gradients and survival of male and female WT and D2 mice subjected to sham or TAC surgery.
- Page 12: Supplemental Figure 10 - Patency of aortocaval Shunt by repeated measurement of LVEDD.
- Page 13: Supplemental Figure 11 – Network of differential regulated pathway in the transcriptomes of D2-TAC vs. MD2-shunt mice.

Page 15: Supplemental Table 1 - Differentially regulated cell cycle genes, as determined by RNA-Seq.

Page 16: Supplemental Table 2 - Differentially regulated pathways in the transcriptomes of D2-TAC vs. D2-shunt mice.

Page 26: Supplemental Table 3 – Top 100 differential regulated genes in the transcriptomes of D2-TAC vs. D2-shunt mice.

**Supplemental Figure 1: Exaggerated hypertrophy in D2-TAC mice compared to WT-TAC.**

Representative echocardiographic recordings from a sham-operated, a WT-TAC and D2-TAC mice 3 and 10 weeks post-surgery (please note that the 10 week data set is identical to that shown in Figure 3E, and are repeated here to facilitate comparison to the 3 week data set).

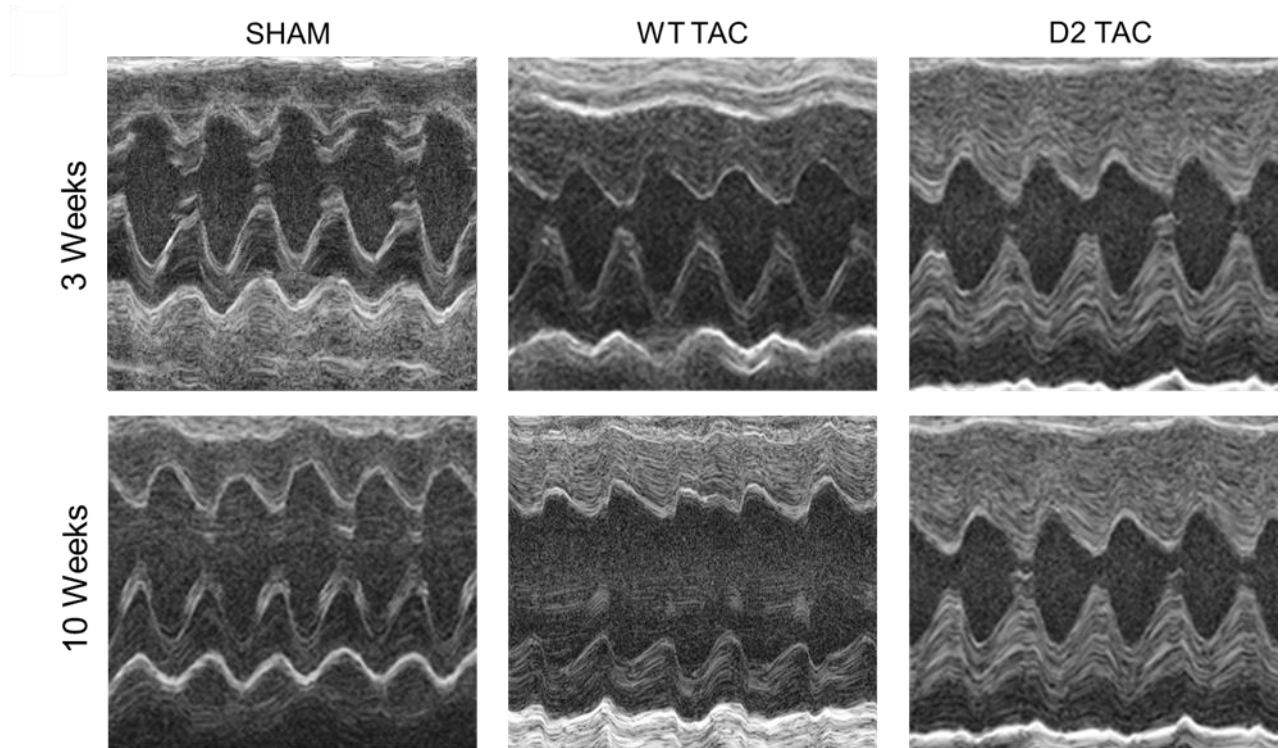

**Supplemental Figure 2: Exaggerated hypertrophy in D2-TAC mice compared to WT-TAC.**

Echocardiographic phenotype after 1, 3 and 10 weeks following either sham or TAC surgery in WT and D2 mice. A) Septum thickness B) Fractional shortening (FS). C) Left ventricular end diastolic dimension (LVEDD). Statistical analyses: two-way analysis of variance (ANOVA) followed by the Bonferroni procedure.

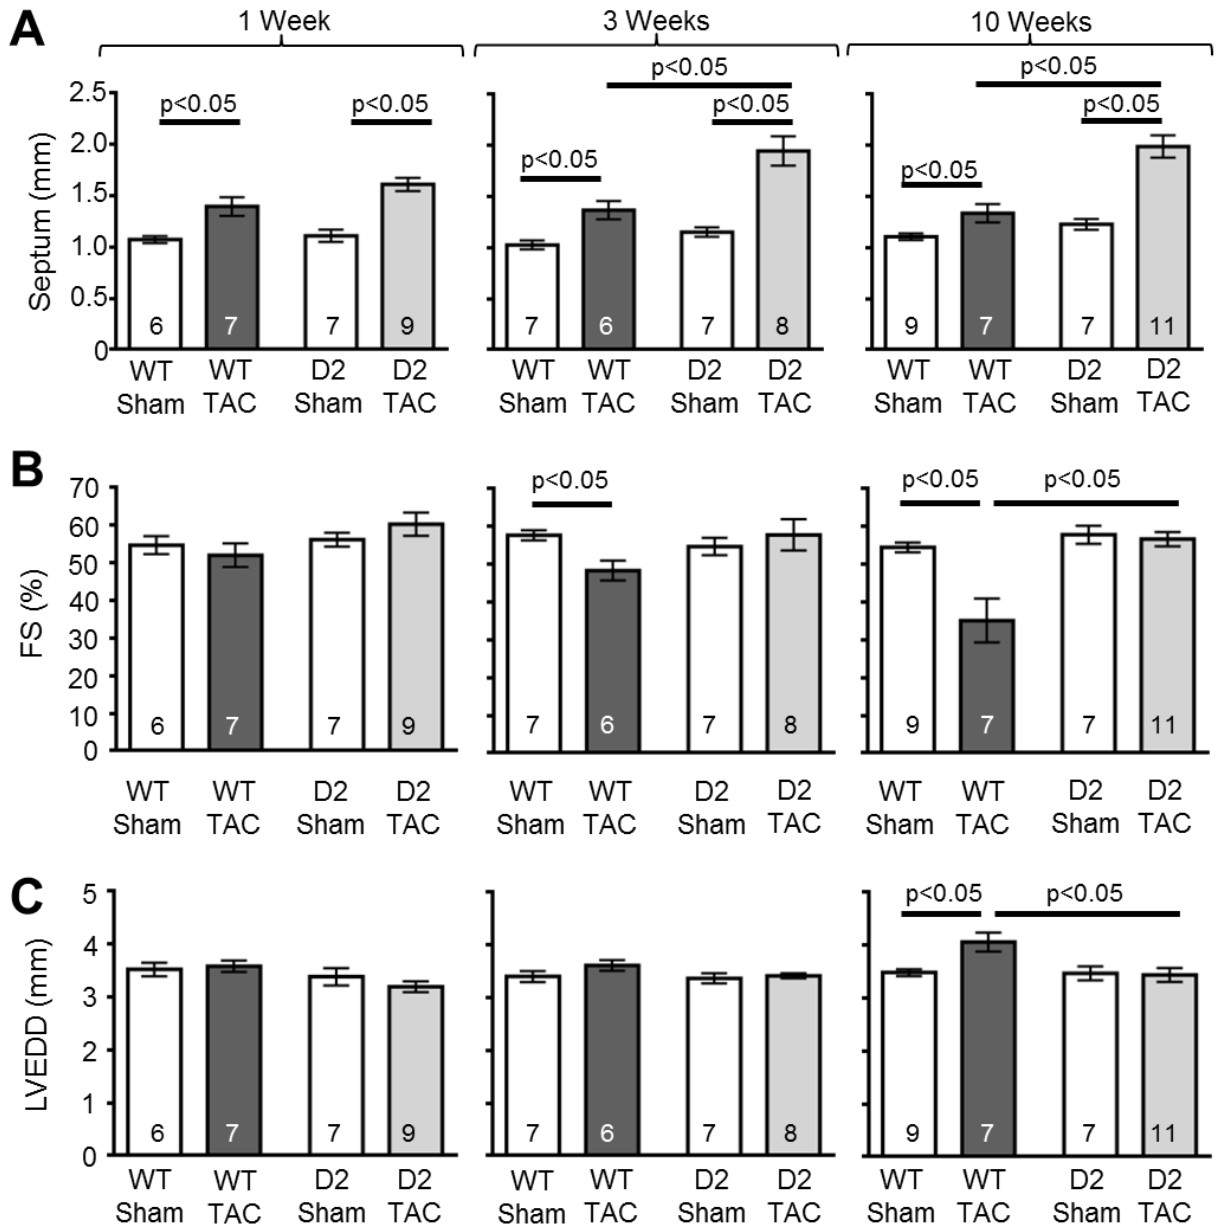

**Supplemental Figure 3: Reduced CAMK2d activation in D2-TAC.** Western blot example of phosphorylated CAMK2d, CAMK2d and GAPDH in WT and D2 mice 1, 3 and 10 weeks after TAC or Sham operation (CAMK2d and phosphorylated CAMK2d were obtained from parallel blots. GAPDH was analyzed in both blots). Data shown is from individual animals.

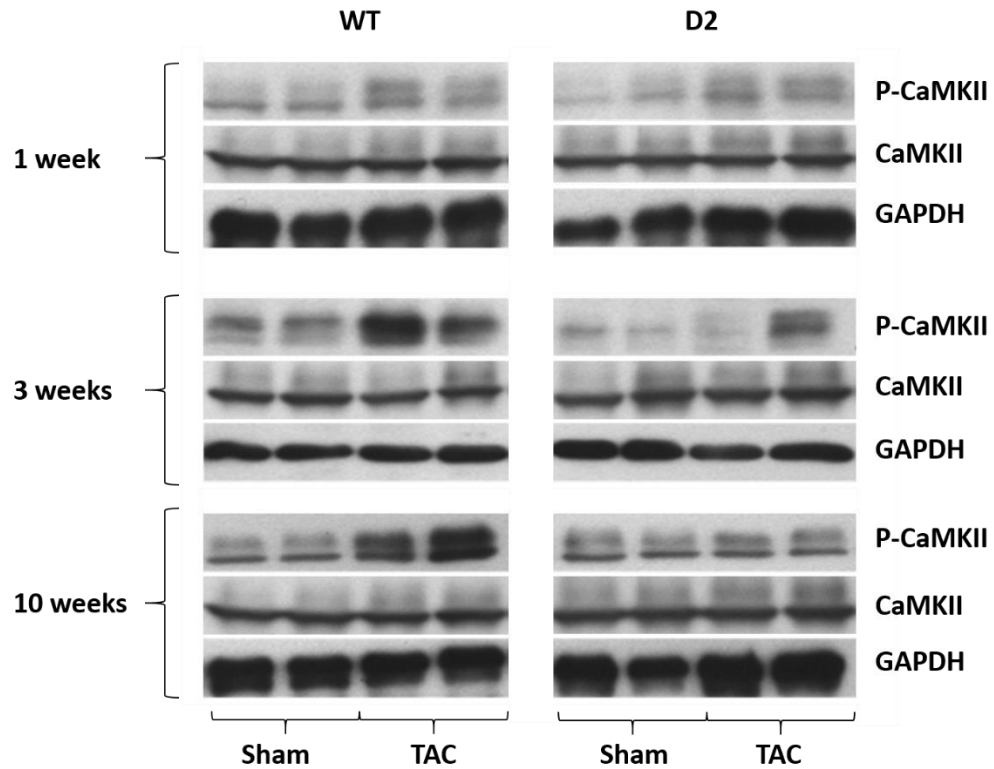



**Supplemental Figure 4. No overt protection against TAC-induced perivascular fibrosis in D2 hearts.**

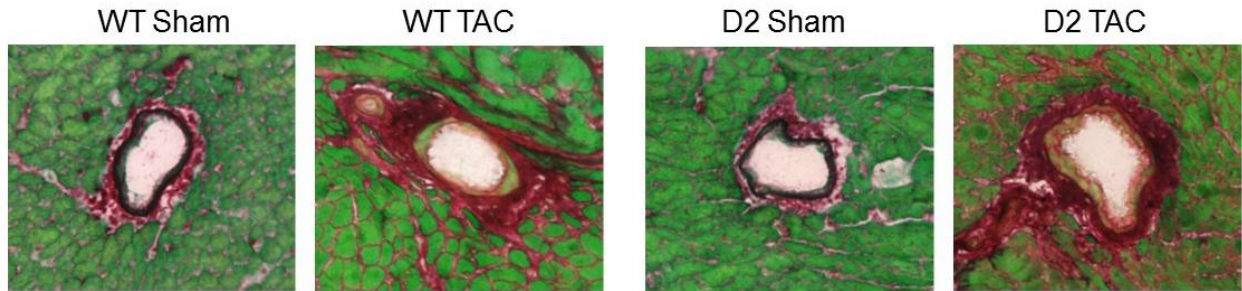

**Supplemental Figure 5: Sustained capillarization of myocytes following TAC surgery in D2-TAC mice.** Capillaries were identified by CD31 endothelial cell staining. Number of CD31 positive cells were related to cardiomyocyte numbers in sections. After 10 weeks number of capillaries per cardiomyocyte was reduced in WT-TAC but not in D2-TAC mice. Statistical analyses: two-way analysis of variance (ANOVA) followed by the Bonferroni procedure.

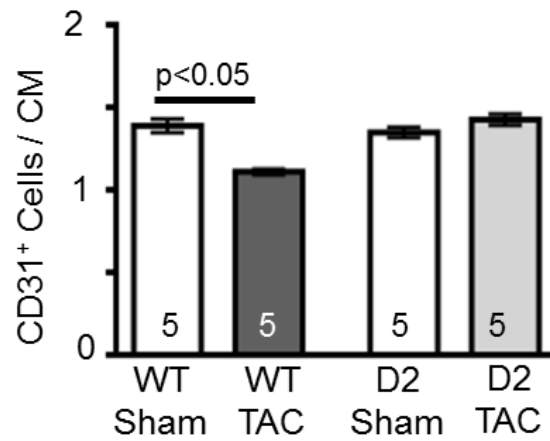



**Supplemental Figure 6: Impact of Shunt on cardiomyocyte cell cycle activity and cell dimensions.** A) Phosphorylated histone H3 (PH3) in D2-TAC vs. D2-Shunt (please note that the D2 TAC PH3 data is identical to that shown in Figure 4C, and is repeated here to facilitate comparison to the D2 Shunt PH3 data). B) Examples of isolated cardiomyocytes 10 weeks after Shunt. C) Measurement of cardiomyocyte width 10 weeks following sham or Shunt surgery in WT and D2 mice. D) Measurement of cardiomyocytes length 10 weeks following sham or Shunt surgery in WT and D2 mice. Statistical analyses: t-test for A, two-way analysis of variance (ANOVA) followed by the Bonferroni procedure for C+D.

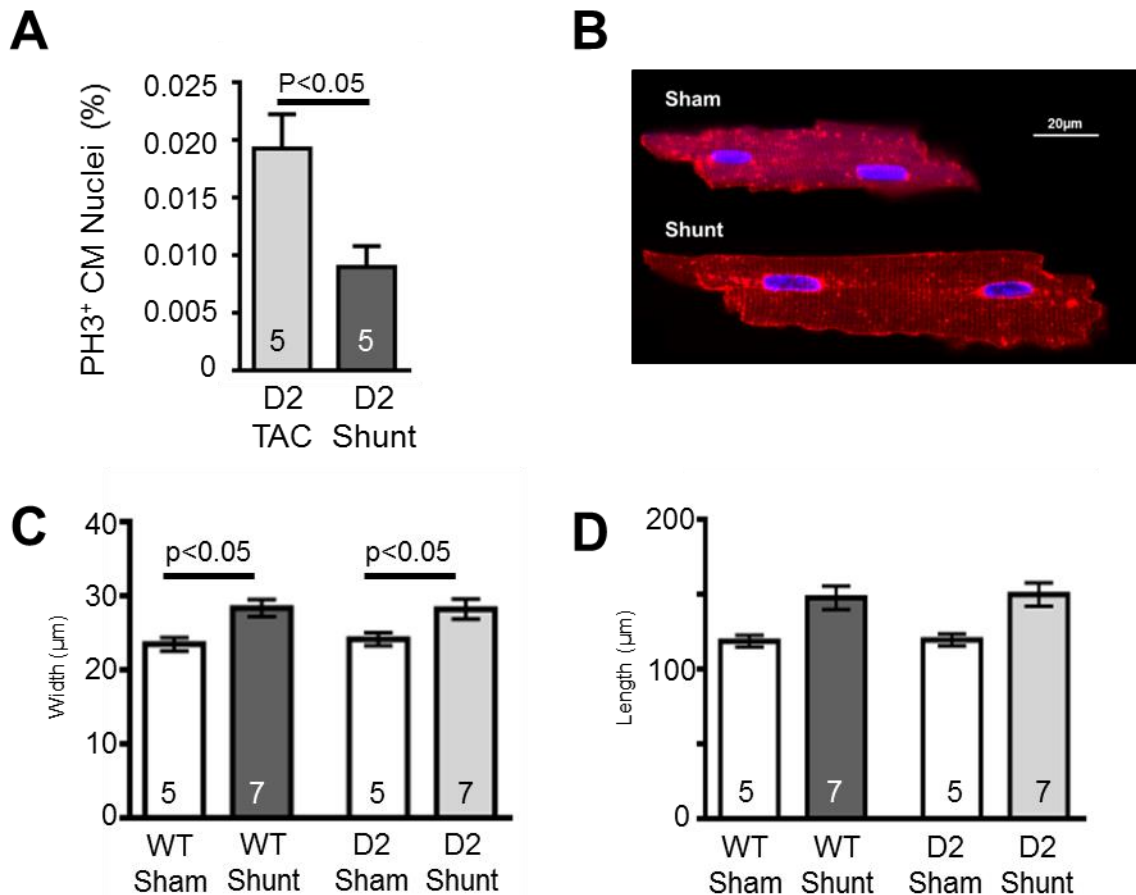

**Supplemental Figure 7:** Increases in cardiac mass in sham operated D2 mice occur largely after 9 weeks of age. (A) Plot of heart weight / tibia length (HW/TL) for sham operated wild type and sham operated D2 mice at 1, 3 and 10 weeks post-surgery (corresponding to 9 (n: WT 6 vs. D2 7), 12 (n: WT 7 vs. D2 7) and 18 (n: WT 9 vs. D2 7) weeks of age). (B) Plot of septum thickness (as determined via echocardiography) for the same time periods. (C) Plot of minimal cardiomyocyte fiber diameter (MFD) for the same time periods. Significant increases in cardiac mass are apparent only at 12 and 18 weeks of age (ie., at 3 and 10 weeks post-sham surgery, panels A and B). Since MFD was comparable between D2 and WT mice at all time points, these data argue that the increased mass in D2 mice reflects an increase in cardiomyocyte numbers, which occurred predominately between 9 and 18 weeks of age in the D2 mice. Statistical analyses: two-way analysis of variance (ANOVA).

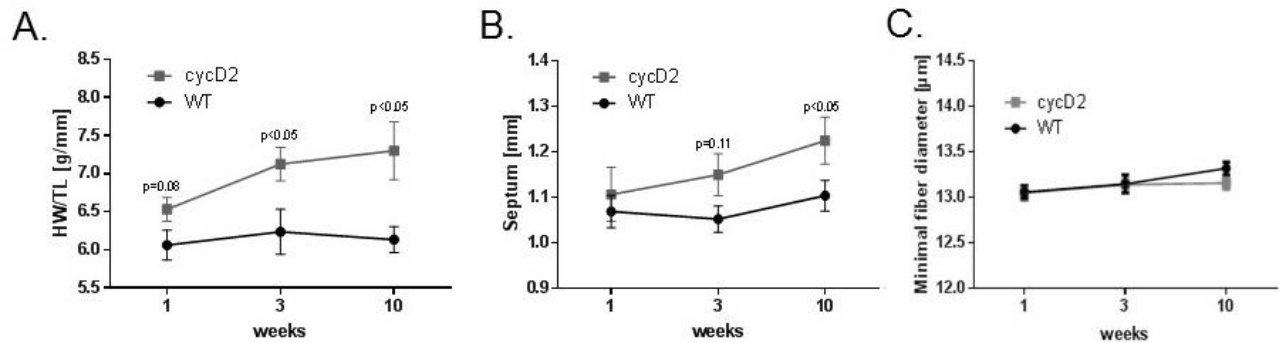

**Supplemental Figure 8:** Pressure gradient across the constricting ligature in WT and D2 mice following sham or TAC surgery (n=15/18/13/15). Statistical analyses: two-way analysis of variance (ANOVA) followed by the Bonferroni procedure.

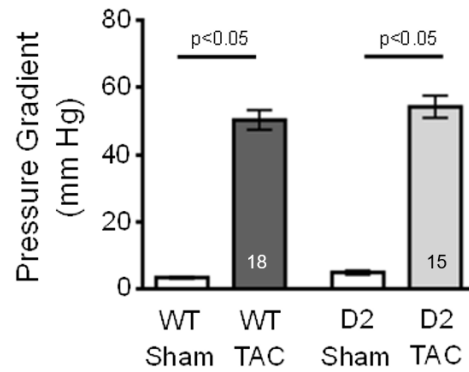

**Supplemental Figure 9:** Pressure gradients and survival of male and female WT and D2 mice subjected to sham or TAC surgery. A) Body weight of male and female WT and D2 animals. B) Pressure gradient across the constricting ligature in male and female WT and D2 mice following sham or TAC surgery (n=7/8/8/5/8/9/7/8). C) Survival plot of male (dashed line) or female (solid line) WT-TAC (black line; n: female 5, male 5), D2-TAC (red line; n: female 5, male 5). Statistical analyses: two-way analysis of variance (ANOVA) followed by the Bonferroni procedure.

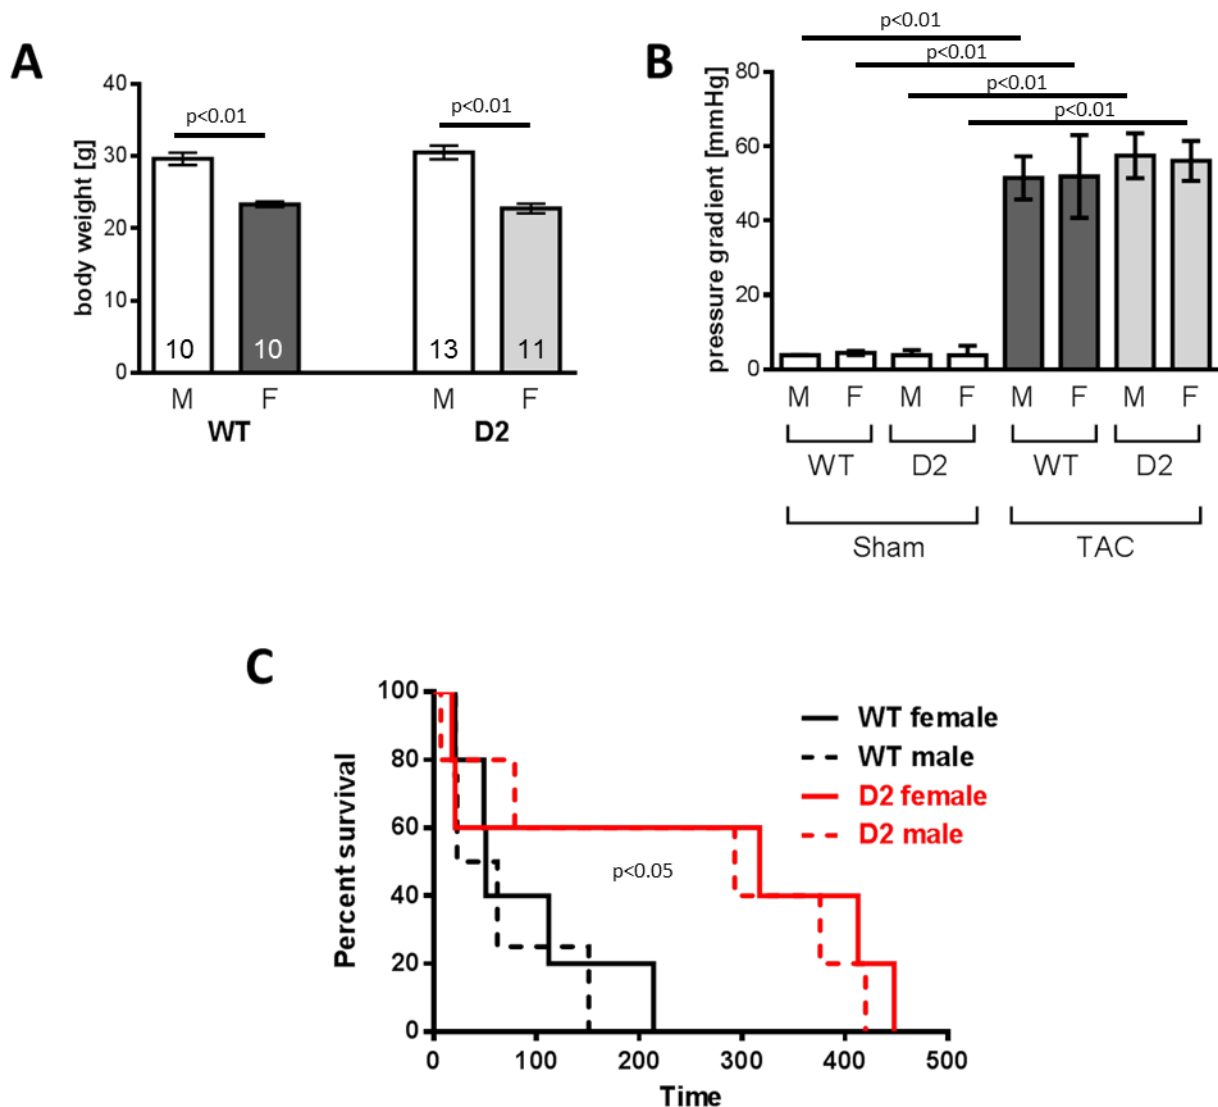

**Supplemental Figure 10: Patency of aortocaval Shunt by repeated measurement of LVEDD.**

A) Unpublished data from a previous study show that ~10% of Shunt operated mice show a decline of the left ventricular end diastolic diameter (LVEDD) over time (red lines). B) Measurement of right ventricular oxygen saturation was increased >90% in the mice following shunt surgery (data not shown). Oxygen saturation continued to be >90% in shunt operated mice with persistent left ventricular dilatation (blue lines). Oxygen saturation of shunt operated mice with normalization of LVEDD (red lines) and sham operated mice (black lines) was <90%. Data from individual animals is depicted.

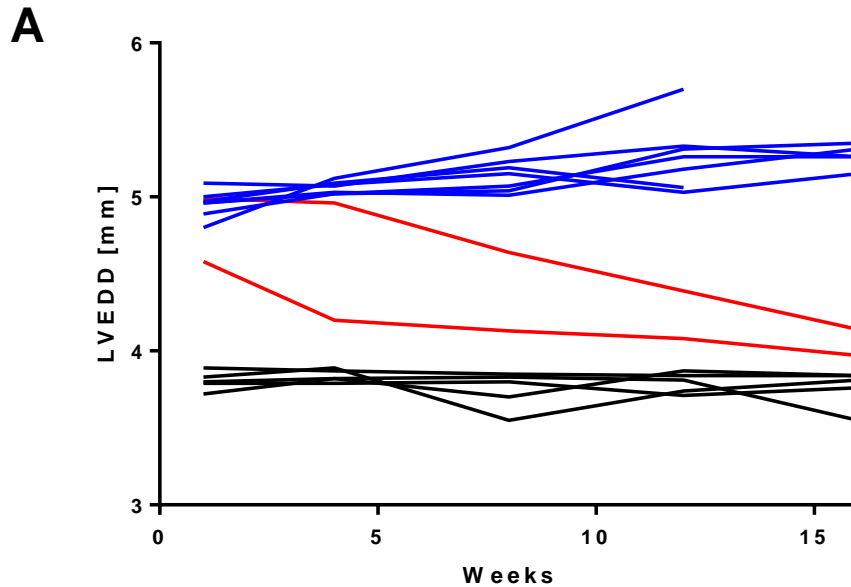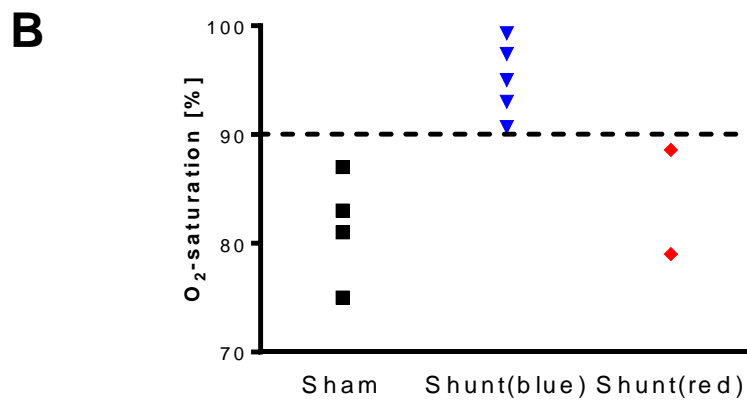

**Supplemental Figure 11: Pathway difference between D2-TAC and D2-Shunt mice.** Network of differential regulated pathway from ClueGO analysis of significantly regulated genes in the transcriptomes of D2-TAC (n=3) vs. D2-shunt mice (n=5).

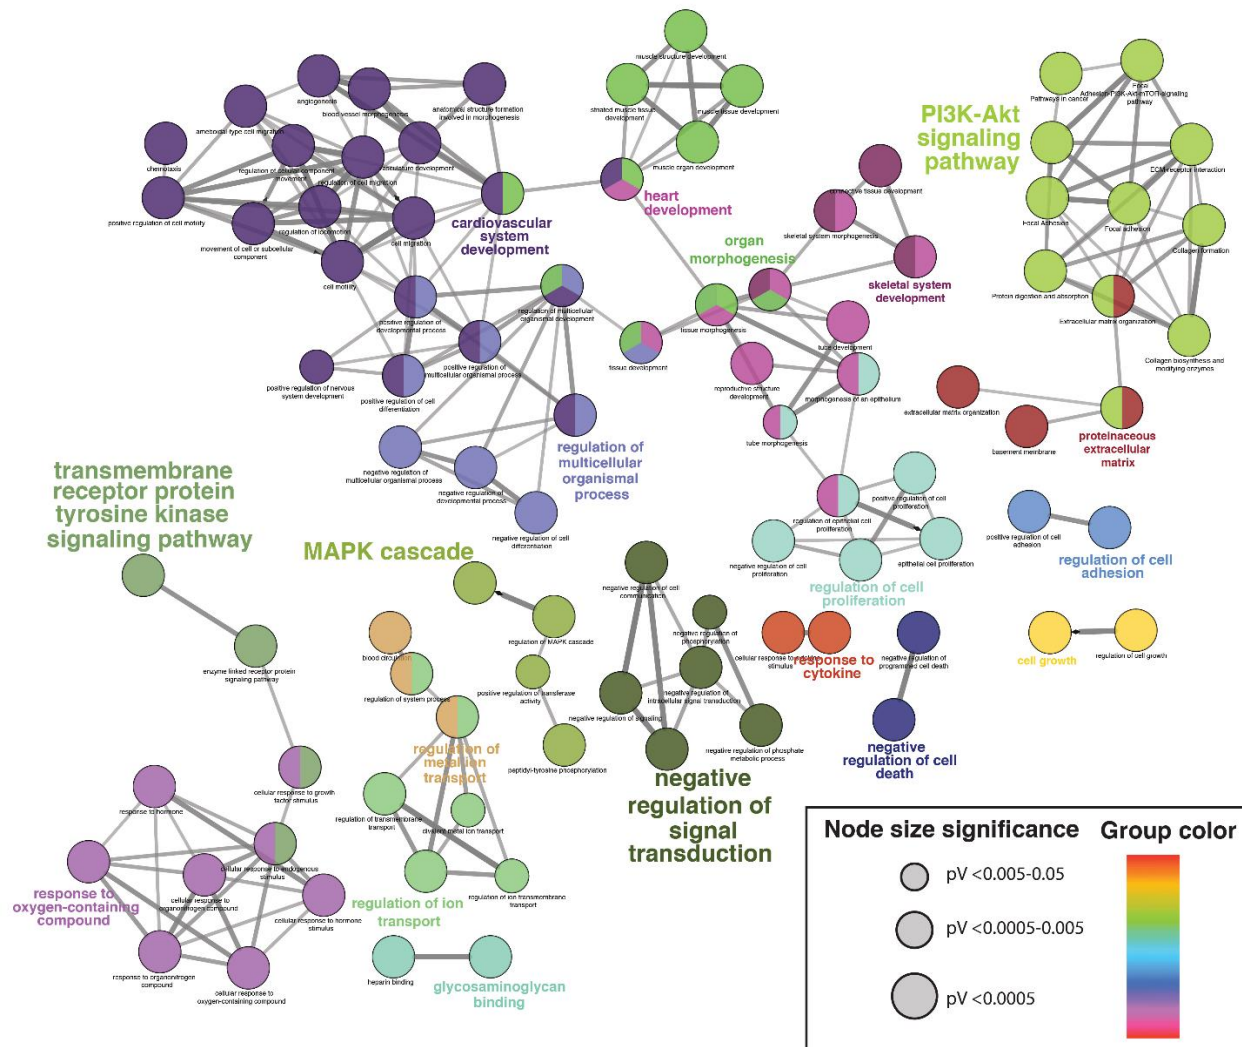

**Supplemental Table 1:** Differentially regulated cell cycle genes (determined by RNA-Seq and KEGG-pathway mmu04110 analysis, as well as by non-canonical candidate testing; WT n=5, D2-Sham n=5, D2-TAC n=3, D2-Shunt n=5).

**WT vs. D2-Sham**

| <b>gene name</b> | <b>baseMean</b> | <b>log2FoldChange</b> | <b>Padj</b> |
|------------------|-----------------|-----------------------|-------------|
| Ccnd2            | 281940          | 6,84                  | 0           |
| Cdkn2c           | 515             | 1,90                  | 4,6E-121    |
| Mcm2             | 608             | 2,39                  | 1,01E-95    |
| Mcm5             | 342             | 1,85                  | 2,32E-41    |
| Mcm7             | 317             | 1,27                  | 8,63E-25    |
| Mcm4             | 449             | 1,04                  | 1,05E-24    |
| Bub1b            | 64              | 1,51                  | 8,58E-17    |
| E2f1             | 71              | 1,29                  | 3,44E-14    |
| Cdc20            | 61              | 1,21                  | 2,13E-10    |
| Chek1            | 38              | 1,09                  | 6,92E-08    |
| Pitx2            | 12              | 1,229                 | 1,06E-05    |

**D2-Sham vs. D2-TAC**

| <b>gene name</b> | <b>baseMean</b> | <b>log2FoldChange</b> | <b>padj</b> |
|------------------|-----------------|-----------------------|-------------|
| Myc              | 100             | 1,15                  | 0,0003      |
| Tgfb2            | 703             | 2,39                  | 5,68E-29    |
| Plk1             | 47              | 1,53                  | 3,28E-08    |
| Ccnb2            | 62              | 1,25                  | 1,96E-06    |
| Ttk              | 25              | 1,44                  | 1,05E-05    |
| Bub1             | 45              | 1,32                  | 7,64E-05    |
| Ccna2            | 167             | 1,13                  | 0,0006      |
| Ccnb1            | 26              | 1,16                  | 0,0012      |
| Cdkn1a           | 1588            | 1,06                  | 0,0145      |
| Wee1             | 485             | -1,04                 | 0,0173      |

**D2-Sham vs. D2-Shunt**

| <b>gene name</b> | <b>baseMean</b> | <b>log2FoldChange</b> | <b>padj</b> |
|------------------|-----------------|-----------------------|-------------|
| none             |                 |                       |             |

**D2-TAC vs. D2-Shunt**

| <b>gene name</b> | <b>baseMean</b> | <b>log2FoldChange</b> | <b>padj</b> |
|------------------|-----------------|-----------------------|-------------|
| Myc              | 116             | -1,03                 | 0,0011      |
| Tgfb2            | 815             | -2,15                 | 6,62E-23    |
| Wee1             | 675             | 1,60                  | 6,28E-08    |



**Supplemental Table 2:** Gene ontology/pathway term network from differential regulated genes in the transcriptomes of D2-TAC (n=3) vs. D2-shunt mice (n=5).

| GOID       | GO Term                                        | Nr. Genes | % Associated Genes | Term P Value Corrected with Bonferroni step down | Associated Genes Found                                                                                                                                                                                                                                                                                                                  |
|------------|------------------------------------------------|-----------|--------------------|--------------------------------------------------|-----------------------------------------------------------------------------------------------------------------------------------------------------------------------------------------------------------------------------------------------------------------------------------------------------------------------------------------|
| WP:85      | Focal Adhesion                                 | 23        | 12,432432          | 8,90E-10                                         | [Blk, Col11a1, Col1a1, Col1a2, Col3a1, Col4a1, Col4a4, Col5a1, Col5a2, Col5a3, Col6a2, Egfr, Fn1, Igf1, Itga11, Itga9, Itgb3, Lamb3, Lamc3, Pdgfc, Pik3r1, Thbs4, Tnc]                                                                                                                                                                  |
| GO:000165  | MAPK cascade                                   | 36        | 5,4216866          | 1,41E-05                                         | [Angpt1, Cbs, Ccl11, Ctgf, Cyr61, Dixdc1, Dok5, Dusp7, Edn3, Egfr, Erbb4, Ereg, Fgf18, Gdf15, Gdf6, Grm4, Hsph1, Igf1, Itgb3, Lepr, Lif, Lpar2, Mdfi, Myc, Myoc, Ngfr, Per1, Pla2g5, Plvap, Rgs2, Sfrp1, Sfrp2, Sox9, Tbc1d10c, Tgfb2, Wnk2]                                                                                            |
| GO:0001501 | skeletal system development                    | 40        | 8,492569           | 1,37E-11                                         | [Acan, Cbs, Col11a1, Col1a1, Col1a2, Col5a2, Ctgf, Cyr61, Dnm3os, Fbn1, Fbn2, Fgf18, Fgf6, Foxc2, Frem1, Fst, Igf1, Loxl3, Mdfi, Mgp, Mmp14, Mmp2, Myc, Myoc, Pdgfc, Prrx2, Pthlh, Rgn, Runx1, Scx, Sfrp1, Sfrp2, Sh3pxd2b, Snai1, Sox9, Sparc, Tbx15, Tgfb2, Twist1, Zbtb16]                                                           |
| GO:0001525 | angiogenesis                                   | 36        | 8,759124           | 8,11E-11                                         | [Ace, Amot, Angpt1, Ccl11, Ccl2, Col4a1, Col8a1, Col8a2, Ctgf, Cx3cl1, Cyp1b1, Cyr61, Ecm1, Egr3, Ereg, Esm1, Fgf18, Fgf6, Fn1, Foxc2, Hif3a, Hspb1, Itgb3, Lepr, Lif, Loxl3, Mmp2, Otulin, Ptgs2, Runx1, Serpinf1, Sfrp2, Sparc, Srp2, Tnfrsf12a, Tnmd]                                                                                |
| GO:0001558 | regulation of cell growth                      | 22        | 6,4327483          | 9,77E-05                                         | [Cda, Cgref1, Ctgf, Cth, Cyr61, Enpp1, Esm1, Fbp2, Fhl1, Fn1, Igf1, Igfbp2, Igfbp6, Mmp14, Nppa, Nppb, Pi16, Sfrp1, Sfrp2, Slc25a33, Tgfb2, Tnfrsf12a]                                                                                                                                                                                  |
| GO:0001667 | ameboidal-type cell migration                  | 21        | 7,118644           | 4,72E-05                                         | [Amot, Angpt1, Cyp1b1, Edn3, Egr3, Erbb4, Fgf18, Fgf7, Foxc2, Has1, Hspb1, Itgb3, Loxl3, Ptgs2, Serpinf1, Sox9, Sparc, Srp2, Tgfb2, Timp1, Twist1]                                                                                                                                                                                      |
| GO:0001944 | vasculature development                        | 47        | 7,8202996          | 2,24E-12                                         | [Ace, Aldh1a2, Amot, Angpt1, Ccl11, Ccl2, Col1a1, Col1a2, Col3a1, Col4a1, Col5a1, Col8a1, Col8a2, Ctgf, Cx3cl1, Cyp1b1, Cyr61, Ecm1, Egr3, Ereg, Esm1, Fgf18, Fgf6, Fn1, Foxc2, Foxs1, Hif3a, Hspb1, Igf1, Itgb3, Lepr, Lif, Lox, Loxl3, Mmp2, Otulin, Prrx2, Ptgs2, Runx1, Serpinf1, Sfrp2, Sparc, Srp2, Tgfb2, Tnfrsf12a, Tnmd, Wnt2] |
| GO:0002009 | morphogenesis of an epithelium                 | 31        | 6,2                | 5,69E-06                                         | [Aldh1a2, Angpt1, Ccl11, Col4a1, Col5a1, Cthrc1, Cyr61, Egfr, Enah, Etv4, Fgf7, Foxc2, Fst, Igf1, Lif, Mgp, Mmp14, Mmp2, Myc, Ngfr, Pthlh, Runx1, Sfrp1, Sfrp2, Snai1, Sox9, St14, Tgfb2, Tnc, Twist1, Wnt2]                                                                                                                            |
| WP:2841    | Focal Adhesion-PI3K-Akt-mTOR-signaling pathway | 33        | 10,091743          | 1,63E-11                                         | [Angpt1, Col11a1, Col1a1, Col1a2, Col3a1, Col4a1, Col4a4, Col5a1, Col5a2, Col5a3, Col6a2, Creb3l1, Egfr, Fgf18, Fgf6, Fgf7, Fn1, Gng8, Hif3a, Igf1, Irs3, Itga11, Itga9, Itgb3, Lamb3, Lamc3, Lpar2, Ngfr, Pdgfc, Pfkfb1, Pik3r1, Thbs4, Tnc]                                                                                           |
| KEGG:04151 | PI3K-Akt signaling pathway                     | 34        | 9,60452            | 2,79E-11                                         | [Angpt1, Col11a1, Col1a1, Col1a2, Col3a1, Col4a1, Col4a4, Col5a1, Col5a2, Col5a3, Col6a1, Col6a2, Col6a3, Col6a5, Creb3l1, Egfr, Fgf18, Fgf6, Fgf7, Fn1,                                                                                                                                                                                |

## Supplemental Data, Page 18

|            |                                                  |    |           |          |                                                                                                                                                                                                                                                                                                                                                                                                                                                                                                                                                                                           |
|------------|--------------------------------------------------|----|-----------|----------|-------------------------------------------------------------------------------------------------------------------------------------------------------------------------------------------------------------------------------------------------------------------------------------------------------------------------------------------------------------------------------------------------------------------------------------------------------------------------------------------------------------------------------------------------------------------------------------------|
|            |                                                  |    |           |          | Gng8, Igf1, Itga11, Itga9, Itgb3, Lamb3, Lamc3, Lpar2, Myc, Ngfr, Pdgfc, Pik3r1, Thbs4, Tnc]                                                                                                                                                                                                                                                                                                                                                                                                                                                                                              |
| KEGG:04510 | Focal adhesion                                   | 26 | 12,5      | 4,09E-11 | [Col11a1, Col1a1, Col1a2, Col3a1, Col4a1, Col4a4, Col5a1, Col5a2, Col5a3, Col6a1, Col6a2, Col6a3, Col6a5, Egfr, Fn1, Igf1, Itga11, Itga9, Itgb3, Lamb3, Lamc3, Pdgfc, Pik3r1, Shc4, Thbs4, Tnc]                                                                                                                                                                                                                                                                                                                                                                                           |
| KEGG:04512 | ECM-receptor interaction                         | 22 | 25        | 1,00E-15 | [Col11a1, Col1a1, Col1a2, Col3a1, Col4a1, Col4a4, Col5a1, Col5a2, Col5a3, Col6a1, Col6a2, Col6a3, Col6a5, Fn1, Itga11, Itga9, Itgb3, Lamb3, Lamc3, Sdc1, Thbs4, Tnc]                                                                                                                                                                                                                                                                                                                                                                                                                      |
| KEGG:04974 | Protein digestion and absorption                 | 20 | 22,47191  | 2,74E-13 | [Col11a1, Col12a1, Col15a1, Col1a1, Col1a2, Col22a1, Col3a1, Col4a1, Col4a4, Col5a1, Col5a2, Col5a3, Col6a1, Col6a2, Col6a3, Col6a5, Col9a2, Eln, Slc1a1, Slc8a2]                                                                                                                                                                                                                                                                                                                                                                                                                         |
| KEGG:05200 | Pathways in cancer                               | 23 | 5,793451  | 2,67E-04 | [Arnt2, Col4a1, Col4a4, Egfr, Fgf18, Fgf6, Fgf7, Fn1, Gng8, Igf1, Lamb3, Lamc3, Lpar2, Mmp2, Myc, Pik3r1, Plcg2, Ptg2, Runx1, Tgfb2, Wnt2, Wnt5b, Zbtb16]                                                                                                                                                                                                                                                                                                                                                                                                                                 |
| GO:0005539 | glycosaminoglycan binding                        | 24 | 13,333333 | 7,53E-11 | [Acan, Adamts8, Bgn, Ccdc80, Ccl2, Col5a1, Col5a3, Ctgf, Cyr61, Dpysl3, Egflam, Fgf7, Fn1, Fstl1, Gpnmb, Ltbp2, Mdk, Pcolce, Pla2g5, Postn, Ptn, Sfrp1, Thbs4, Tpsb2]                                                                                                                                                                                                                                                                                                                                                                                                                     |
| GO:0005578 | proteinaceous extracellular matrix               | 70 | 20,289856 | 2,40E-45 | [Acan, Adamts20, Adamts4, Adamts8, Adamtsl2, Bgn, Ccdc80, Col11a1, Col12a1, Col15a1, Col16a1, Col1a1, Col1a2, Col26a1, Col3a1, Col4a1, Col4a4, Col5a1, Col5a2, Col5a3, Col6a1, Col6a2, Col6a3, Col6a5, Col8a1, Col8a2, Col9a2, Ctgf, Cthrc1, Cyr61, Ecm1, Egflam, Eln, Emilin1, Emilin2, Fbn1, Fbn2, Fn1, Frem1, Igf1, Lamb3, Lamc3, Lox, Loxl1, Loxl3, Mfap2, Mfap4, Mfap5, Mmp2, Mmp3, Myoc, P3h2, Postn, Ptn, Runx1, Serpinf1, Sfrp1, Snca, Sparc, Spon2, Tgfb2, Thbs4, Timp1, Timp3, Tnc, Tnfrsf11b, Vwa1, Vwc2, Wnt2, Wnt5b]                                                         |
| GO:0005604 | basement membrane                                | 27 | 25,233644 | 1,53E-19 | [Acan, Ccdc80, Col15a1, Col4a1, Col4a4, Col5a1, Col8a1, Col8a2, Egflam, Fbn1, Fn1, Frem1, Lamb3, Lamc3, Loxl1, Loxl3, P3h2, Runx1, Serpinf1, Sparc, Tgfb2, Thbs4, Timp1, Timp3, Tnc, Vwa1, Vwc2]                                                                                                                                                                                                                                                                                                                                                                                          |
| GO:0006928 | movement of cell or subcellular component        | 82 | 5,430464  | 7,53E-13 | [Acan, Ace, Amot, Angpt1, Ccl11, Ccl2, Ccl21a, Celsr3, Col1a1, Col3a1, Col5a1, Ctgf, Cthrc1, Cx3cl1, Cyp1b1, Cyr61, Dixdc1, Dnaic1, Dpysl3, Drd1, Dsg2, Dynll1, Ecm1, Edn3, Efhc1, Efnb3, Egfr, Egr2, Egr3, Enah, Erbb4, Etv4, Fgf18, Fgf7, Fn1, Foxc2, Has1, Hspb1, Igf1, Itga11, Itga9, Itgb3, Kcnh2, Kif1a, Kif5c, Loxl3, Lrp8, Lrrc15, Mdk, Mmp14, Mmp2, Mmp3, Myoc, Neurl1a, Ngfr, Pik3r1, Plvap, Pou4f1, Ptg2, Pvr1, Rgn, Rnf207, Rras2, Sdc1, Serpinf1, Sfrp1, Sfrp2, Snai1, Sorbs2, Sox9, Sparc, Srgap3, Srxp2, St14, Tgfb2, Thbs4, Timp1, Tnfrsf12a, Tll1, Tubb3, Twist1, Wnt5b] |
| GO:0006935 | chemotaxis                                       | 27 | 5,9602647 | 5,16E-05 | [Amot, Angpt1, Ccl11, Ccl2, Ccl21a, Ccl2, Cx3cl1, Cxcr6, Cyr61, Edn3, Efnb3, Egr2, Egr3, Enah, Etv4, Fgf18, Fgf7, Fn1, Hspb1, Itga9, Itgb3, Kif5c, Ngfr, Pvr1, Tgfb2, Thbs4, Tubb3]                                                                                                                                                                                                                                                                                                                                                                                                       |
| GO:0007167 | enzyme linked receptor protein signaling pathway | 51 | 6,4803047 | 1,94E-10 | [Adamts3, Adamtsl2, Afap1l2, Angpt1, Bex1, Blk, Ccl2, Col1a2, Col3a1, Ctgf, Cyr61, Dok5, Efnb3, Egfr, Enpp1, Erbb4, Ereg, Esm1, Fbn1, Fbn2, Fgf18, Fgf6, Fgf7, Foxc2, Fst, Fstl3, Gdf15, Gdf6, Hspb1, Igf1, Igfbp2, Igfbp6, Irs3, Lif, Myoc, Neurl1a, Ngef, Ngfr, Nppa, Pdgfc, Pik3r1, Ptp, Scx, Sfrp1, Sfrp2, Sh2b2, Shc4, Snca, Sox9, Tgfb2, Vwc2]                                                                                                                                                                                                                                      |

## Supplemental Data, Page 19

|            |                                                                  |    |           |          |                                                                                                                                                                                                                                                                                                                                                                                                                                                                                                                                                                                                                                                                                        |
|------------|------------------------------------------------------------------|----|-----------|----------|----------------------------------------------------------------------------------------------------------------------------------------------------------------------------------------------------------------------------------------------------------------------------------------------------------------------------------------------------------------------------------------------------------------------------------------------------------------------------------------------------------------------------------------------------------------------------------------------------------------------------------------------------------------------------------------|
| GO:0007169 | transmembrane receptor protein tyrosine kinase signaling pathway | 34 | 6,9246435 | 1,37E-07 | [Adamts3, Afap1l2, Angpt1, Bex1, Blk, Ccl2, Ctgf, Dok5, Efnb3, Egfr, Enpp1, Erbb4, Ereg, Esm1, Fgf18, Fgf6, Fgf7, Foxc2, Hspb1, Igf1, Igfbp2, Igfbp6, Irs3, Myoc, Neurl1a, Ngef, Ngfr, Pdgfc, Pik3r1, Ptprt, Sh2b2, Shc4, Snca, Sox9]                                                                                                                                                                                                                                                                                                                                                                                                                                                  |
| GO:0007507 | heart development                                                | 25 | 5,2742615 | 3,88E-04 | [Ace, Adam19, Aldh1a2, Angpt1, Ankrd1, Col11a1, Col3a1, Col5a1, Cyr61, Dsg2, Erbb4, Fbn1, Foxc2, Pi16, Pou4f1, Scx, Sfrp2, Sh3pxd2b, Snai1, Sox9, Tcap, Tgfb2, Twist1, Wnt2, Xirp2]                                                                                                                                                                                                                                                                                                                                                                                                                                                                                                    |
| GO:0007517 | muscle organ development                                         | 27 | 7,520891  | 9,09E-07 | [Acta1, Angpt1, Ankrd1, Arntl, Cenpf, Col11a1, Col3a1, Des, Egr2, Eln, Erbb4, Foxc2, Gpcpd1, Hlf, Lif, Myc, Nr1d2, Nupr1, Pi16, Pou4f1, Rcan1, Scx, Tcap, Twist1, Usp2, Wnt2, Xirp2]                                                                                                                                                                                                                                                                                                                                                                                                                                                                                                   |
| GO:0008015 | blood circulation                                                | 25 | 6,097561  | 6,70E-05 | [Ace, Amot, Angpt1, Cbs, Col1a2, Corin, Ctgf, Cx3cl1, Drd1, Dsg2, Edn3, Egfr, Foxc2, Gnao1, Kcne1, Kcnh2, Mmp2, Nppa, Nppb, Pik3r1, Ptgs2, Rgs2, Rnf207, Tcap, Tgfb2]                                                                                                                                                                                                                                                                                                                                                                                                                                                                                                                  |
| GO:0008201 | heparin binding                                                  | 20 | 14,705882 | 8,72E-10 | [Adamts8, Ccdc80, Ccl2, Col5a1, Col5a3, Ctgf, Cyr61, Fgf7, Fn1, Fstl1, Gpnmb, Ltbp2, Mdk, Pcolce, Pla2g5, Postn, Ptn, Sfrp1, Thbs4, Tpsb2]                                                                                                                                                                                                                                                                                                                                                                                                                                                                                                                                             |
| GO:0008284 | positive regulation of cell proliferation                        | 49 | 6,155779  | 3,02E-09 | [Aldh1a2, Arnt2, Bex1, Ccl11, Ccl2, Cd276, Clec11a, Crlf1, Ctgf, Cthrc1, Cx3cl1, Cyr61, Ecm1, Edn3, Egfr, Egr3, Erbb4, Ereg, Esm1, Fgf18, Fgf6, Fgf7, Igf1, Igfbp2, Itgb3, Lif, Malat1, Myc, Nampt, Ngfr, Pdgfc, Plac8, Prrx2, Ptgs2, Pthlh, Ptn, Scx, Sfrp1, Sfrp2, Shc4, Slc25a33, Sox9, St8sia1, Tgfb2, Thbs4, Timp1, Tnc, Twist1, Wnt2]                                                                                                                                                                                                                                                                                                                                            |
| GO:0008285 | negative regulation of cell proliferation                        | 35 | 5,852843  | 3,93E-06 | [Aldh1a2, Cd276, Cth, Ctla4, Cyp1b1, Dhcr24, Erbb4, Ereg, Etv4, Igf1, Kctd11, Klf9, Lif, Myc, Neurl1a, Nppb, Nupr1, P3h2, Pik3r1, Prnp, Ptgs2, Ptgs2, Ptprv, Rgn, Runx1, Serpinf1, Sfrp1, Sfrp2, Sox9, Sparc, Srp, Tgfb2, Tnmd, Wnk2, Zbtb16]                                                                                                                                                                                                                                                                                                                                                                                                                                          |
| GO:0009725 | response to hormone                                              | 34 | 5,7724957 | 7,29E-06 | [Adam19, Adh1, Aldob, Ass1, Blk, Cry2, Egfr, Egr2, Egr3, Enpp1, Foxc2, Gck, Gpr22, Irs3, Klf9, Lepr, Lox, Mmp14, Mmp2, Ngfr, Npc1, Nr1d1, Nr1d2, Nr3c2, Nr5a1, Pik3r1, Ptprv, Sfrp1, Sh2b2, Slc25a33, Slc27a1, Tgfb2, Timp1, Timp3]                                                                                                                                                                                                                                                                                                                                                                                                                                                    |
| GO:0009887 | organ morphogenesis                                              | 60 | 6,3424945 | 6,30E-12 | [Acan, Aldh1a2, Angpt1, Ankrd1, Atp8a2, Cbs, Ccl11, Col11a1, Col1a1, Col1a2, Col3a1, Col5a1, Col5a2, Col8a1, Col8a2, Corin, Crb1, Ctgf, Cthrc1, Cyr61, Egfr, Ereg, Etv4, Fbn2, Fgf18, Fgf6, Fgf7, Foxc2, Frem1, Fst, Gcnt4, Igf1, Lif, Mdfi, Mmp14, Mmp2, Myc, Ngfr, Pdgfc, Pou4f1, Prrx2, Pthlh, Ptn, Pvr1, Rp1, Scx, Sfrp1, Sfrp2, Snai1, Sox9, T2, Tbx15, Tcap, Tgfb2, Tnc, Tnfrsf11b, Twist1, Wnt2, Wnt5b, Xirp2]                                                                                                                                                                                                                                                                  |
| GO:0009888 | tissue development                                               | 98 | 5,6943636 | 4,68E-17 | [Abca12, Acan, Acta1, Adamts20, Aldh1a2, Angpt1, Ankrd1, Arntl, Atp8a2, Cbs, Ccdc67, Ccl11, Cd276, Cenpf, Ces1d, Col11a1, Col1a1, Col3a1, Col4a1, Col5a1, Col5a2, Corin, Cst6, Ctgf, Cthrc1, Cyp1b1, Cyr61, Dgat2, Dhcr24, Dnm3os, Dsg2, Ecm1, Edn3, Egfr, Egr2, Eln, Enah, Enpp1, Erbb4, Etv4, Fbn2, Fgf18, Fgf6, Fgf7, Fn1, Foxc2, Fst, Gcnt4, Gpcpd1, Hlf, Igf1, Igsf10, Insc, Itgb3, Kcne1, Klf15, Lamc3, Leo1, Lif, Loxl3, Meox1, Mgp, Mmp14, Mmp2, Myc, Ngfr, Nr1d2, Nr5a1, Nupr1, Pi16, Postn, Pou4f1, Ppl, Prrx2, Ptgs2, Pthlh, Ptn, Pvr1, Rcan1, Rp1, Runx1, Sbn2, Scx, Sfrp1, Sfrp2, Sh3pxd2b, Snai1, Sox9, St14, Tcap, Tgfb2, Tnc, Tnmd, Twist1, Usp2, Wnt2, Xirp2, Zbtb16] |

## Supplemental Data, Page 20

|            |                                            |    |           |          |                                                                                                                                                                                                                                                                                                                                                                                                                                                                        |
|------------|--------------------------------------------|----|-----------|----------|------------------------------------------------------------------------------------------------------------------------------------------------------------------------------------------------------------------------------------------------------------------------------------------------------------------------------------------------------------------------------------------------------------------------------------------------------------------------|
| GO:0009968 | negative regulation of signal transduction | 47 | 5,0865803 | 2,09E-06 | [Adamts2, Arntl, Corin, Creb3l1, Cry2, Cth, Cthrc1, Cx3cl1, Dusp7, Ecm1, Enpp1, Faim2, Fbn1, Fbn2, Fbp2, Fst, Fstl3, Herpud1, Hspb1, Hsph1, Igf1, Kctd11, Lif, Mdfi, Mmp3, Myoc, Neurl1a, Ngfr, Nkd2, Nlrc3, Nr1d1, Per1, Prnp, Rgs2, Rgs7bp, Sfrp1, Sfrp2, Snai1, Snca, Sox9, Tbc1d10c, Tnfrsf23, Tnip3, Twist1, Vwc2, Wnk2, Wnt5b]                                                                                                                                   |
| GO:0010243 | response to organonitrogen compound        | 39 | 6,489185  | 5,98E-08 | [Aldob, Blk, Cbs, Col16a1, Col1a1, Col1a2, Col3a1, Col4a1, Col5a2, Col6a1, Cry2, Drd1, Egfr, Egr2, Egr3, Enpp1, Foxc2, Gck, Gnao1, Gpr22, Irs3, Mmp2, Mmp3, Myc, Neurl1a, Ngfr, Panx1, Pdgfc, Per1, Pik3r1, Plcg2, Ptpv, Sfrp1, Sh2b2, Slc25a33, Slc26a6, Slc27a1, Snca, Sox9]                                                                                                                                                                                         |
| GO:0010648 | negative regulation of cell communication  | 54 | 5,142857  | 1,67E-07 | [Adamts2, Arntl, Corin, Creb3l1, Cry2, Cth, Cthrc1, Cx3cl1, Drd1, Dusp7, Ecm1, Edn3, Enpp1, Faim2, Fbn1, Fbn2, Fbp2, Fst, Fstl3, Gck, Herpud1, Hspb1, Hsph1, Igf1, Kctd11, Lif, Mdfi, Mmp3, Myoc, Neurl1a, Ngfr, Nkd2, Nlrc3, Npc1, Nr1d1, Per1, Pim3, Prnp, Ptgs2, Ptpv, Rgs2, Rgs7bp, Sfrp1, Sfrp2, Snai1, Snca, Sox9, Tbc1d10c, Tnfrsf23, Tnip3, Twist1, Vwc2, Wnk2, Wnt5b]                                                                                         |
| GO:0010959 | regulation of metal ion transport          | 23 | 7,055215  | 2,12E-05 | [Ace, Cacnb1, Drd1, Edn3, Fhl1, Gck, Gnao1, Gpr39, Igf1, Itgb3, Kcne1, Kcnh2, Nppa, Oprd1, Per1, Plcg2, Prnp, Ptgs2, Rgn, Rnf207, Snca, Tgfb2, Wnk2]                                                                                                                                                                                                                                                                                                                   |
| GO:0014706 | striated muscle tissue development         | 27 | 7,2       | 2,07E-06 | [Acta1, Aldh1a2, Angpt1, Ankrd1, Arntl, Cenpf, Col11a1, Dsg2, Egr2, Eln, Erbb4, Foxc2, Gpcpd1, Hlf, Myc, Nr1d2, Nupr1, Pi16, Pou4f1, Rcan1, Scx, Tcap, Tgfb2, Twist1, Usp2, Wnt2, Xirp2]                                                                                                                                                                                                                                                                               |
| GO:0016049 | cell growth                                | 26 | 6,0465117 | 5,56E-05 | [Cda, Cgref1, Ctgf, Cth, Cyr61, Emp1, Enpp1, Esm1, Fbp2, Fhl1, Fn1, Igf1, Igfbp2, Igfbp6, Itgb3, Mmp14, Nppa, Nppb, Nupr1, Pi16, Sfrp1, Sfrp2, Slc25a33, Sox9, Tgfb2, Tnfrsf12a]                                                                                                                                                                                                                                                                                       |
| GO:0016477 | cell migration                             | 65 | 5,9963098 | 6,99E-12 | [Acan, Ace, Amot, Angpt1, Ccl11, Ccl2, Ccl21a, Celsr3, Col1a1, Col3a1, Col5a1, Ctgf, Cthrc1, Cx3cl1, Cyp1b1, Cyr61, Dixdc1, Dpysl3, Drd1, Ecm1, Edn3, Efhc1, Egfr, Egr3, Erbb4, Fgf18, Fgf7, Fn1, Foxc2, Has1, Hspb1, Igf1, Itga11, Itga9, Itgb3, Loxl3, Lrp8, Lrrc15, Mdk, Mmp14, Mmp2, Mmp3, Myoc, Pik3r1, Plvap, Pou4f1, Ptgs2, Rras2, Sdc1, Serpinf1, Sfrp1, Sfrp2, Snai1, Sorbs2, Sox9, Sparc, Srgap3, Srp2, St14, Tgfb2, Thbs4, Timp1, Tnfrsf12a, Twist1, Wnt5b] |
| GO:0018108 | peptidyl-tyrosine phosphorylation          | 21 | 6,7524114 | 7,99E-05 | [Ace, Afap1l2, Angpt1, Blk, Cd4, Crlf1, Egfr, Erbb4, Ereg, Fgf7, Hsph1, Igf1, Itgb3, Lif, Lrp8, Neurl1a, Pdgfc, Sfrp1, Sfrp2, Thbs4, Wee1]                                                                                                                                                                                                                                                                                                                             |
| GO:0023057 | negative regulation of signaling           | 53 | 5,0669217 | 3,63E-07 | [Adamts2, Arntl, Corin, Creb3l1, Cry2, Cth, Cthrc1, Cx3cl1, Drd1, Dusp7, Ecm1, Edn3, Enpp1, Faim2, Fbn1, Fbn2, Fbp2, Fst, Fstl3, Gck, Herpud1, Hspb1, Hsph1, Igf1, Kctd11, Lif, Mdfi, Mmp3, Myoc, Neurl1a, Ngfr, Nkd2, Nlrc3, Nr1d1, Per1, Pim3, Prnp, Ptgs2, Ptpv, Rgs2, Rgs7bp, Sfrp1, Sfrp2, Snai1, Snca, Sox9, Tbc1d10c, Tnfrsf23, Tnip3, Twist1, Vwc2, Wnk2, Wnt5b]                                                                                               |
| GO:0030155 | regulation of cell adhesion                | 36 | 6,405694  | 3,31E-07 | [Angpt1, Ass1, Ccdc80, Ccl2, Cd276, Cd4, Col16a1, Col1a1, Col26a1, Col8a1, Ctl4, Cx3cl1, Cyp1b1, Cyr61, Egflam, Egr3, Emilin1, Foxc2, Fstl3, Hsph1, Igf1, Igfbp2, Itgb3, Lag3, Mmp14, Mmp2, Myoc, Pik3r1, Prnp, Ptn, Sox9, Tgfb2, Tnc, Tnfsf18, Vwc2, Zbtb16]                                                                                                                                                                                                          |
| GO:0030198 | extracellular matrix organization          | 36 | 17,647058 | 1,46E-20 | [Acan, Adamts20, Bcl3, Ccdc80, Col11a1, Col1a1, Col1a2, Col3a1, Col4a1, Col4a4, Col5a1, Col5a2, Col5a3, Creb3l1, Ctgf, Cyp1b1, Cyr61, Egflam, Eln,                                                                                                                                                                                                                                                                                                                     |

## Supplemental Data, Page 21

|            |                                              |    |           |          |                                                                                                                                                                                                                                                                                                                                                                                                                                                                                                                                                    |
|------------|----------------------------------------------|----|-----------|----------|----------------------------------------------------------------------------------------------------------------------------------------------------------------------------------------------------------------------------------------------------------------------------------------------------------------------------------------------------------------------------------------------------------------------------------------------------------------------------------------------------------------------------------------------------|
|            |                                              |    |           |          | Emilin1, Fn1, Foxc2, Has1, Lox, Loxl3, Mfap4, Mfap5, P4ha1, Postn, Scx, Sfrp2, Sh3pxd2b, Sox9, Tgfb2, Tnfrsf11b, Vwa1]                                                                                                                                                                                                                                                                                                                                                                                                                             |
| GO:0030334 | regulation of cell migration                 | 47 | 7,8333335 | 2,14E-12 | [Acan, Ace, Amot, Angpt1, Ccl11, Ccl2, Ccl21a, Col1a1, Col3a1, Cx3cl1, Cyp1b1, Cyr61, Dpysl3, Drd1, Ecm1, Edn3, Egfr, Erbb4, Fgf18, Fgf7, Fn1, Foxc2, Has1, Hspb1, Igf1, Itgb3, Lrrc15, Mmp14, Mmp2, Mmp3, Myoc, Pik3r1, Plvap, Ptgs2, Rras2, Serpinf1, Sfrp1, Sfrp2, Snai1, Sox9, Sparc, Srgap3, Srxp2, Tgfb2, Thbs4, Timp1, Wnt5b]                                                                                                                                                                                                               |
| GO:0032870 | cellular response to hormone stimulus        | 24 | 5,714286  | 2,39E-04 | [Blk, Egfr, Egr2, Egr3, Enpp1, Foxc2, Gck, Gpr22, Irs3, Klf9, Lepr, Mmp2, Ngfr, Npc1, Nr1d1, Nr1d2, Nr3c2, Nr5a1, Pik3r1, Ptpv, Sfrp1, Sh2b2, Slc25a33, Slc27a1]                                                                                                                                                                                                                                                                                                                                                                                   |
| GO:0034097 | response to cytokine                         | 27 | 5,283757  | 2,50E-04 | [Aldh1a2, Angpt1, Ankrd1, Aqp4, Ccl2, Ccl2, Col3a1, Cx3cl1, Cxcr6, Ecm1, Ereg, Fn1, Lepr, Nfil3, Plvap, Ptgs2, Ptpn, Rps6ka5, Sfrp1, Sh2b2, Slc26a6, Slc27a1, Snca, Star, Timp1, Timp3, Tnfsf18]                                                                                                                                                                                                                                                                                                                                                   |
| GO:0034762 | regulation of transmembrane transport        | 22 | 5,6265984 | 3,83E-04 | [Ace, Cacnb1, Cacng6, Clcn1, Edn3, Fhl1, Kcnd2, Kcne1, Kcnh2, Kcnh7, Kcnj3, Kcnj6, Kcnv2, Nppa, Plcg2, Prnp, Rgn, Rnf207, Shank1, Slc26a6, Twist1, Wnk2]                                                                                                                                                                                                                                                                                                                                                                                           |
| GO:0034765 | regulation of ion transmembrane transport    | 20 | 5,347594  | 8,22E-04 | [Ace, Cacnb1, Cacng6, Clcn1, Edn3, Fhl1, Kcnd2, Kcne1, Kcnh2, Kcnh7, Kcnj3, Kcnj6, Kcnv2, Nppa, Plcg2, Prnp, Rgn, Rnf207, Shank1, Wnk2]                                                                                                                                                                                                                                                                                                                                                                                                            |
| GO:0035239 | tube morphogenesis                           | 21 | 5,316456  | 9,35E-04 | [Aldh1a2, Angpt1, Ccl11, Col4a1, Cthrc1, Egfr, Enah, Etv4, Foxc2, Igf1, Mgp, Mmp14, Myc, Pthlh, Sfrp1, Sfrp2, Sox9, St14, Tnc, Twist1, Wnt2]                                                                                                                                                                                                                                                                                                                                                                                                       |
| GO:0035295 | tube development                             | 33 | 5,28      | 5,44E-05 | [Abca12, Ace, Aldh1a2, Angpt1, Ccl11, Clmp, Col3a1, Col4a1, Ctgf, Cthrc1, Egfr, Enah, Etv4, Fgf18, Fgf7, Foxc2, Igf1, Insc, Lif, Lox, Mgp, Mmp14, Myc, Pdgfc, Pthlh, Sfrp1, Sfrp2, Sox9, Sparc, St14, Tnc, Twist1, Wnt2]                                                                                                                                                                                                                                                                                                                           |
| GO:0040012 | regulation of locomotion                     | 50 | 7,1530757 | 9,75E-12 | [Acan, Ace, Amot, Angpt1, Ccl11, Ccl2, Ccl21a, Col1a1, Col3a1, Cx3cl1, Cyp1b1, Cyr61, Dpysl3, Drd1, Ecm1, Edn3, Egfr, Erbb4, Fgf18, Fgf7, Fn1, Foxc2, Has1, Hspb1, Igf1, Itgb3, Lrrc15, Mmp14, Mmp2, Mmp3, Myoc, Pik3r1, Plvap, Ptgs2, Rgn, Rras2, Serpinf1, Sfrp1, Sfrp2, Snai1, Snca, Sox9, Sparc, Srgap3, Srxp2, Tgfb2, Thbs4, Timp1, Twist1, Wnt5b]                                                                                                                                                                                            |
| GO:0042127 | regulation of cell proliferation             | 78 | 5,5084743 | 1,72E-12 | [Ace, Aldh1a2, Angpt1, Arnt2, Bex1, Blk, Ccl11, Ccl2, Cd276, Clec11a, Crlf1, Ctgf, Cth, Cthrc1, Ctla4, Cx3cl1, Cyp1b1, Cyr61, Dhcr24, Ecm1, Edn3, Egfr, Egr3, Erbb4, Ereg, Esm1, Etv4, Fgf18, Fgf6, Fgf7, Igf1, Igfbp2, Itgb3, Kctd11, Klf9, Lif, Malat1, Myc, Nampt, Neurl1a, Ngfr, Nppb, Nr1d1, Nr3c2, Nupr1, P3h2, Pdgfc, Pik3r1, Plac8, Prnp, Prrx2, Ptgds, Ptgs2, Pthlh, Ptn, Ptpv, Rgn, Runx1, Scx, Serpinf1, Sfrp1, Sfrp2, Shc4, Slc25a33, Sox9, Sparc, Srxp, St8sia1, Tgfb2, Thbs4, Timp1, Tnc, Tnfsf18, Tnmd, Twist1, Wnk2, Wnt2, Zbtb16] |
| GO:0042326 | negative regulation of phosphorylation       | 20 | 5,1813474 | 6,20E-04 | [Angpt1, Drd1, Dusp7, Dynl1, Enpp1, Hspb1, Hsph1, Igf1, Inpp5j, Lif, Per1, Prnp, Rgn, Rgs2, Sfrp1, Sfrp2, Snca, Tbc1d10c, Twist1, Wnk2]                                                                                                                                                                                                                                                                                                                                                                                                            |
| GO:0043069 | negative regulation of programmed cell death | 45 | 5,3956833 | 7,92E-07 | [Adamts20, Angpt1, Arnt2, Bcl3, Cbs, Creb3l1, Crlf1, Cth, Cx3cl1, Cyr61, Dhcr24, Egfr, Egr2, Egr3, Erbb4, Faim2, Fn1, Foxc2, Herpud1, Hspa1b, Hspb1, Hsph1, Igf1, Mdk, Myc, Ngfr, Pik3r1, Pim3, Plac8, Plcg2, Pou4f1, Prnp, Rgn,                                                                                                                                                                                                                                                                                                                   |

## Supplemental Data, Page 22

|            |                                                          |    |           |          |                                                                                                                                                                                                                                                                                                                                                                                                                                                                                          |
|------------|----------------------------------------------------------|----|-----------|----------|------------------------------------------------------------------------------------------------------------------------------------------------------------------------------------------------------------------------------------------------------------------------------------------------------------------------------------------------------------------------------------------------------------------------------------------------------------------------------------------|
|            |                                                          |    |           |          | Scx, Sfrp1, Sfrp2, Snai1, Snca, Sox9, Star, Tgfb2, Timp1, Tnfaip8, Tnfrsf23, Twist1]                                                                                                                                                                                                                                                                                                                                                                                                     |
| GO:0043269 | regulation of ion transport                              | 34 | 5,5737705 | 1,52E-05 | [Ace, Atp8a2, Cacnb1, Cacng6, Clcn1, Drd1, Edn3, Fhl1, Gck, Gnao1, Gpr39, Igf1, Itgb3, Kcnd2, Kcne1, Kcnh2, Kcnh7, Kcnj3, Kcnj6, Kcnv2, Nppa, Oprd1, Per1, Plcg2, Prnp, Ptgs2, Rgn, Rnf207, Shank1, Slc38a3, Snca, Tgfb2, Twist1, Wnk2]                                                                                                                                                                                                                                                  |
| GO:0043408 | regulation of MAPK cascade                               | 31 | 5,175292  | 1,17E-04 | [Angpt1, Cbs, Ctgf, Cyr61, Dixdc1, Dusp7, Edn3, Egfr, Erbb4, Ereg, Fgf18, Gdf15, Gdf6, Grm4, Hsph1, Igf1, Itgb3, Lepr, Lif, Lpar2, Mdfi, Myoc, Ngfr, Per1, Pla2g5, Rgs2, Sfrp1, Sfrp2, Tbc1d10c, Tgfb2, Wnk2]                                                                                                                                                                                                                                                                            |
| GO:0044057 | regulation of system process                             | 27 | 6,1085973 | 3,69E-05 | [Corin, Cry2, Ctgf, Cx3cl1, Drd1, Dsg2, Edn3, Egfr, Gnao1, Gpr39, Igf1, Kcne1, Kcnh2, Lif, Lmcd1, Mmp2, Ngfr, Nppa, Nppb, Oprd1, Pi16, Pik3r1, Ptgs2, Rgs2, Rnf207, Runx1, Tgfb2]                                                                                                                                                                                                                                                                                                        |
| GO:0045596 | negative regulation of cell differentiation              | 36 | 5,106383  | 4,69E-05 | [Arntl, Bex1, Col3a1, Col5a1, Col5a2, Corin, Ctla4, Dixdc1, Dpysl3, Enpp1, Ereg, Foxc2, Fst, Fstl3, Igf1, Inpp5j, Itgb3, Kctd11, Leo1, Lif, Myc, Ngef, Ngfr, Padi4, Pi16, Pik3r1, Pthlh, Runx1, Sfrp1, Sfrp2, Snai1, Sox9, Tgfb2, Tob2, Twist1, Zbtb16]                                                                                                                                                                                                                                  |
| GO:0045597 | positive regulation of cell differentiation              | 47 | 5,452436  | 3,00E-07 | [Ace, Adamts20, Ankrd1, Arntl, Atp8a2, Bex1, Cd276, Col1a1, Ctgf, Cthrc1, Cx3cl1, Cyr61, Dixdc1, Dpysl3, Edn3, Egr3, Fbn2, Fgf18, Fn1, Gdf15, Gdf6, Igf1, Itgb3, Kctd11, Lif, Loxl3, Lrp8, Myoc, Neurl1a, Pik3r1, Ptgs2, Ptn, Runx1, Serpinf1, Sfrp1, Sfrp2, Sh3pxd2b, Shank1, Snai1, Sox9, Star, Tgfb2, Tnfrsf12a, Twist1, Vwc2, Wnt5b, Zbtb16]                                                                                                                                         |
| GO:0045785 | positive regulation of cell adhesion                     | 24 | 7,594937  | 3,88E-06 | [Angpt1, Ccdc80, Ccl2, Cd276, Cd4, Col16a1, Col26a1, Col8a1, Cx3cl1, Cyr61, Egflam, Egr3, Emilin1, Foxc2, Fstl3, Hsph1, Igf1, Igfbp2, Itgb3, Myoc, Ptn, Tgfb2, Vwc2, Zbtb16]                                                                                                                                                                                                                                                                                                             |
| GO:0045936 | negative regulation of phosphate metabolic process       | 29 | 5,6530213 | 5,39E-05 | [Angpt1, Cda, Cry2, Csrnp3, Drd1, Dusp7, Dynl1, Enpp1, Fbp2, Hspb1, Hsph1, Igf1, Inpp5j, Lif, Pcdh11x, Pdzd3, Per1, Prnp, Rgn, Rgs2, Sfrp1, Sfrp2, Sh2d4a, Slc27a1, Snca, Tbc1d10c, Tgfb2, Twist1, Wnk2]                                                                                                                                                                                                                                                                                 |
| GO:0048514 | blood vessel morphogenesis                               | 38 | 7,5247526 | 1,72E-09 | [Ace, Amot, Angpt1, Ccl11, Ccl2, Col3a1, Col4a1, Col8a1, Col8a2, Ctgf, Cx3cl1, Cyp1b1, Cyr61, Ecm1, Egr3, Ereg, Esm1, Fgf18, Fgf6, Fn1, Foxc2, Hif3a, Hspb1, Itgb3, Lepr, Lif, Loxl3, Mmp2, Otulin, Prrx2, Ptgs2, Runx1, Serpinf1, Sfrp2, Sparc, Srxp2, Tnfrsf12a, Tnmd]                                                                                                                                                                                                                 |
| GO:0048608 | reproductive structure development                       | 23 | 5,6930695 | 2,97E-04 | [Angpt1, Cyr61, Dhcr24, Egfr, Ereg, Fgf7, Fst, Igf1, Lif, Mdfi, Mmp2, Nr5a1, Nupr1, Ptgs2, Runx1, Serpinf1, Sfrp1, Sfrp2, Snai1, Sox9, St14, Tnc, Wnt2]                                                                                                                                                                                                                                                                                                                                  |
| GO:0048646 | anatomical structure formation involved in morphogenesis | 69 | 6,1883407 | 2,64E-13 | [Ace, Acta1, Amot, Angpt1, Ankrd23, Atp8a2, Bcl3, Ccl11, Ccl2, Celsr3, Col1a1, Col4a1, Col5a1, Col5a2, Col8a1, Col8a2, Ctgf, Cthrc1, Cx3cl1, Cyp1b1, Cyr61, Ecm1, Egr2, Egr3, Enah, Ereg, Esm1, Faim2, Fbn2, Fgf18, Fgf6, Fn1, Foxc2, Gdf15, Hif3a, Hspb1, Itgb3, Leo1, Lepr, Lif, Loxl3, Lrp8, Meox1, Mfap2, Mmp2, Neurl1a, Otulin, Ptgs2, Pthlh, Pvr1, Rp1, Runx1, Sbno2, Scx, Serpinf1, Sfrp1, Sfrp2, Snai1, Sox9, Sparc, Srxp2, St14, T2, Tcap, Tnfrsf12a, Tnmd, Tll1, Twist1, Wnt2] |

## Supplemental Data, Page 23

|            |                                                |     |           |          |                                                                                                                                                                                                                                                                                                                                                                                                                                                                                                                                                                                                                                                                                                                                                                                                                                                                                                               |
|------------|------------------------------------------------|-----|-----------|----------|---------------------------------------------------------------------------------------------------------------------------------------------------------------------------------------------------------------------------------------------------------------------------------------------------------------------------------------------------------------------------------------------------------------------------------------------------------------------------------------------------------------------------------------------------------------------------------------------------------------------------------------------------------------------------------------------------------------------------------------------------------------------------------------------------------------------------------------------------------------------------------------------------------------|
| GO:0048705 | skeletal system morphogenesis                  | 23  | 10,043668 | 5,72E-08 | [Acan, Cbs, Col11a1, Col1a1, Ctgf, Fbn2, Fgf18, Fgf6, Foxc2, Frem1, Mdfi, Mmp14, Mmp2, Myc, Prrx2, Pthlh, Scx, Sfrp1, Sfrp2, Sox9, Tbx15, Tgfb2, Twist1]                                                                                                                                                                                                                                                                                                                                                                                                                                                                                                                                                                                                                                                                                                                                                      |
| GO:0048729 | tissue morphogenesis                           | 42  | 6,521739  | 1,30E-08 | [Aldh1a2, Angpt1, Ankrd1, Atp8a2, Ccl11, Col11a1, Col3a1, Col4a1, Col5a1, Cthrc1, Cyr61, Egfr, Enah, Etv4, Fgf7, Foxc2, Fst, Gcnt4, Igf1, Lif, Mgp, Mmp14, Mmp2, Myc, Ngfr, Pou4f1, Pthlh, Ptn, Rp1, Runx1, Scx, Sfrp1, Sfrp2, Snai1, Sox9, St14, Tcap, Tgfb2, Tnc, Twist1, Wnt2, Xirp2]                                                                                                                                                                                                                                                                                                                                                                                                                                                                                                                                                                                                                      |
| GO:0048870 | cell motility                                  | 67  | 5,6876063 | 2,96E-11 | [Acan, Ace, Amot, Angpt1, Ccl11, Ccl2, Ccl21a, Celsr3, Col1a1, Col3a1, Col5a1, Ctgf, Cthrc1, Cx3cl1, Cyp1b1, Cyr61, Dixdc1, Dpysl3, Drd1, Ecm1, Edn3, Efhc1, Egfr, Egr3, Erbb4, Fgf18, Fgf7, Fn1, Foxc2, Has1, Hspb1, Igf1, Itga11, Itga9, Itgb3, Loxl3, Lrp8, Lrrc15, Mdk, Mmp14, Mmp2, Mmp3, Myoc, Neurl1a, Pik3r1, Plvap, Pou4f1, Ptgs2, Rgn, Rras2, Sdc1, Serpinf1, Sfrp1, Sfrp2, Snai1, Sorbs2, Sox9, Sparc, Srgap3, Srpx2, St14, Tgfb2, Thbs4, Timp1, Tnfrsf12a, Twist1, Wnt5b]                                                                                                                                                                                                                                                                                                                                                                                                                         |
| GO:0050673 | epithelial cell proliferation                  | 33  | 9,295774  | 1,40E-10 | [Aldh1a2, Ccl11, Ccl2, Col8a1, Col8a2, Ecm1, Egfr, Egr3, Erbb4, Ereg, Etv4, Fabp7, Fgf7, Fst, Igf1, Itgb3, Klf9, Loxl3, Myc, Nr1d1, Ptn, Ptprv, Rgn, Serpinf1, Sfrp1, Sfrp2, Sox9, Sparc, Tgfb2, Thbs4, Tnmd, Twist1, Wnt2]                                                                                                                                                                                                                                                                                                                                                                                                                                                                                                                                                                                                                                                                                   |
| GO:0050678 | regulation of epithelial cell proliferation    | 26  | 8,934708  | 5,85E-08 | [Aldh1a2, Ccl11, Ccl2, Ecm1, Egfr, Egr3, Erbb4, Etv4, Fgf7, Igf1, Itgb3, Klf9, Myc, Nr1d1, Ptn, Rgn, Serpinf1, Sfrp1, Sfrp2, Sox9, Sparc, Tgfb2, Thbs4, Tnmd, Twist1, Wnt2]                                                                                                                                                                                                                                                                                                                                                                                                                                                                                                                                                                                                                                                                                                                                   |
| GO:0051093 | negative regulation of developmental process   | 49  | 5,4384017 | 1,59E-07 | [Amot, Arntl, Bex1, Ccl2, Col3a1, Col5a1, Col5a2, Corin, Ctl4, Dixdc1, Dpysl3, Ecm1, Enpp1, Ereg, Etv4, Foxc2, Fst, Fstl3, Igf1, Inpp5j, Itgb3, Kctd11, Leo1, Lif, Myc, Ngef, Ngfr, Nr5a1, Padi4, Pi16, Pik3r1, Plac8, Pthlh, Rgn, Runx1, Serpinf1, Sfrp1, Sfrp2, Snai1, Sox9, Sparc, Tgfb2, Timp1, Tnfrsf11b, Tnmd, Tob2, Twist1, Usp2, Zbtb16]                                                                                                                                                                                                                                                                                                                                                                                                                                                                                                                                                              |
| GO:0051094 | positive regulation of developmental process   | 67  | 5,6208053 | 4,92E-11 | [Ace, Adamts20, Amot, Ankrd1, Arntl, Atp8a2, Bex1, Ccl11, Cd276, Col1a1, Ctgf, Cthrc1, Cx3cl1, Cyp1b1, Cyr61, Dixdc1, Dpysl3, Ecm1, Edn3, Egr3, Erbb4, Fbn2, Fgf18, Fgf7, Fn1, Foxc2, Foxs1, Fst, Gdf15, Gdf6, Hspb1, Igf1, Itgb3, Kctd11, Lif, Loxl3, Lrp8, Lrrn1, Myc, Myoc, Neurl1a, Ngfr, Nr5a1, Pik3r1, Ptgs2, Ptn, Runx1, Scx, Serpinf1, Sfrp1, Sfrp2, Sh3pxd2b, Shank1, Sliitrk2, Snai1, Sox9, Srpx2, Star, Syndig1, Tgfb2, Tnfrsf12a, Twist1, Usp2, Vwc2, Wnt2, Wnt5b, Zbtb16]                                                                                                                                                                                                                                                                                                                                                                                                                        |
| GO:0051239 | regulation of multicellular organismal process | 128 | 5,1097803 | 5,59E-19 | [Ace, Adamts20, Afap112, Amot, Angpt1, Ankrd1, Aqp4, Arntl, Atp8a2, Bcl3, Bex1, Ccl11, Ccl2, Cd276, Cenpf, Col1a1, Col3a1, Col5a1, Col5a2, Colq, Corin, Creb3l1, Cry2, Ctgf, Cthrc1, Ctl4, Cx3cl1, Cyp1b1, Cyr61, Dixdc1, Dpysl3, Drd1, Dsg2, Ecm1, Edn3, Egfr, Egr2, Egr3, Enpp1, Erbb4, Ereg, Etv4, Fbn2, Fgf18, Fgf7, Fn1, Foxc2, Foxs1, Fst, Fstl3, Gdf6, Gnao1, Gpr39, Hspb1, Igf1, Inpp5j, Itgb3, Kcne1, Kcnh2, Kctd11, Lag3, Leo1, Lif, Lmcd1, Loxl3, Lrp8, Lrrn1, Mfap4, Mgp, Mmp2, Myc, Neurl1a, Ngef, Ngfr, Nlrc3, Nppa, Nppb, Nr1d2, Nr5a1, Nupr1, Oprd1, Panx1, Per1, Per3, Pi16, Pik3r1, Plac8, Pou4f1, Prnp, Ptgs2, Ptgs2, Pthlh, Ptn, Pvr1, Rbp1, Rgn, Rgs2, Rnf207, Runx1, Scx, Serpinf1, Sfrp1, Sfrp2, Shank1, Slc27a1, Sliitrk2, Snai1, Sox9, Sparc, Spon2, Srpx2, Ssc5d, Star, Syndig1, Tg, Tgfb2, Thbs4, Timp1, Tnfrsf11b, Tnfrsf12a, Tnmd, Tob2, Tril, Twist1, Usp2, Vwc2, Wnt2, Zbtb16] |

## Supplemental Data, Page 24

|            |                                                         |    |           |          |                                                                                                                                                                                                                                                                                                                                                                                                                                                                                                                                             |
|------------|---------------------------------------------------------|----|-----------|----------|---------------------------------------------------------------------------------------------------------------------------------------------------------------------------------------------------------------------------------------------------------------------------------------------------------------------------------------------------------------------------------------------------------------------------------------------------------------------------------------------------------------------------------------------|
| GO:0051240 | positive regulation of multicellular organismal process | 76 | 5,3184047 | 2,06E-11 | [Ace, Afap1l2, Amot, Angpt1, Ankrd1, Arntl, Atp8a2, Bcl3, Bex1, Ccl11, Ccl2, Cd276, Col1a1, Ctgf, Cthrc1, Cx3cl1, Cyp1b1, Cyr61, Dixdc1, Dpysl3, Ecm1, Edn3, Egfr, Egr3, Erbb4, Ereg, Fbn2, Fgf18, Fgf7, Fn1, Foxc2, Foxs1, Fst, Gdf6, Gpr39, Hspb1, Igf1, Itgb3, Kctd11, Lif, Loxl3, Lrp8, Lrrn1, Myc, Neurl1a, Ngfr, Nppa, Nppb, Nr5a1, Panx1, Pik3r1, Ptgs2, Ptn, Rgs2, Runx1, Scx, Serpinf1, Sfrp2, Shank1, Slc27a1, Slitrk2, Snai1, Sox9, Sparc, Spon2, Srp2, Star, Syndig1, Tgfb2, Tnfrsf12a, Tob2, Twist1, Usp2, Vwc2, Wnt2, Zbtb16] |
| GO:0051241 | negative regulation of multicellular organismal process | 61 | 6,1       | 1,97E-11 | [Amot, Angpt1, Aqp4, Bcl3, Bex1, Ccl2, Cd276, Col3a1, Col5a1, Col5a2, Corin, Cry2, Ctla4, Cx3cl1, Dixdc1, Dpysl3, Drd1, Ecm1, Enpp1, Etv4, Foxc2, Fstl3, Gpr39, Igf1, Inpp5j, Kctd11, Lag3, Leo1, Lif, Mmp2, Myc, Ngef, Ngfr, Nlrc3, Nppa, Nr5a1, Pi16, Pik3r1, Plac8, Prnp, Ptgs2, Pthlh, Rgn, Rgs2, Runx1, Serpinf1, Sfrp1, Sfrp2, Snai1, Sox9, Sparc, Ssc5d, Tgfb2, Timp1, Tnfrsf11b, Tnmd, Tob2, Twist1, Usp2, Zbtb16]                                                                                                                  |
| GO:0051270 | regulation of cellular component movement               | 52 | 7,355021  | 1,10E-12 | [Acan, Ace, Amot, Angpt1, Ccl11, Ccl2, Ccl21a, Col1a1, Col3a1, Cx3cl1, Cyp1b1, Cyr61, Dpysl3, Drd1, Dsg2, Ecm1, Edn3, Egfr, Erbb4, Fgf18, Fgf7, Fn1, Foxc2, Has1, Hspb1, Igf1, Itgb3, Kcnh2, Lrrc15, Mmp14, Mmp2, Mmp3, Myoc, Pik3r1, Plvap, Ptgs2, Rgn, Rnf207, Rras2, Serpinf1, Sfrp1, Sfrp2, Snai1, Sox9, Sparc, Srgap3, Srp2, Tgfb2, Thbs4, Timp1, Twist1, Wnt5b]                                                                                                                                                                       |
| GO:0051347 | positive regulation of transferase activity             | 23 | 5         | 9,48E-04 | [Ace, Afap1l2, Angpt1, Cd4, Cyr61, Edn3, Egfr, Ereg, Fgf18, Grm4, Hsph1, Igf1, Itgb3, Lpar2, Lrp8, Mdfi, Neurl1a, Pdgcfc, Pfkfb1, Serinc2, Slc27a1, Snca, Tgfb2]                                                                                                                                                                                                                                                                                                                                                                            |
| GO:0051962 | positive regulation of nervous system development       | 25 | 5,0916495 | 5,31E-04 | [Ace, Ankrd1, Atp8a2, Bex1, Cx3cl1, Dixdc1, Dpysl3, Fn1, Gdf6, Igf1, Kctd11, Lif, Lrp8, Lrrn1, Neurl1a, Ngfr, Ptn, Serpinf1, Shank1, Slitrk2, Srp2, Star, Syndig1, Tnfrsf12a, Vwc2]                                                                                                                                                                                                                                                                                                                                                         |
| GO:0060537 | muscle tissue development                               | 29 | 7,323232  | 5,20E-07 | [Acta1, Aldh1a2, Angpt1, Ankrd1, Arntl, Cenpf, Col11a1, Col3a1, Dsg2, Egr2, Eln, Erbb4, Foxc2, Gpcpd1, Hlf, Myc, Nr1d2, Nupr1, Pi16, Pou4f1, Rcan1, Scx, Sox9, Tcap, Tgfb2, Twist1, Usp2, Wnt2, Xirp2]                                                                                                                                                                                                                                                                                                                                      |
| GO:0060548 | negative regulation of cell death                       | 51 | 5,610561  | 2,92E-08 | [Adamts20, Angpt1, Arnt2, Bcl3, Cbs, Creb3l1, Crlf1, Ctgf, Cth, Cx3cl1, Cyr61, Dhcr24, Egfr, Egr2, Egr3, Erbb4, Faim2, Fn1, Foxc2, Herpud1, Hspa1b, Hspb1, Hsph1, Igf1, Itgb3, Mdk, Myc, Ngfr, Npas2, Npc1, Pik3r1, Pim3, Plac8, Plcg2, Pou4f1, Prnp, Pycr1, Rgn, Scx, Serpinf1, Sfrp1, Sfrp2, Snai1, Snca, Sox9, Star, Tgfb2, Timp1, Tnfaip8, Tnfrsf23, Twist1]                                                                                                                                                                            |
| GO:0061061 | muscle structure development                            | 36 | 6,060606  | 1,21E-06 | [Acta1, Angpt1, Ankrd1, Ankrd23, Arntl, Cenpf, Col11a1, Col3a1, Des, Egr2, Eln, Erbb4, Ereg, Fgf6, Foxc2, Gdf15, Gpcpd1, Hlf, Igf1, Lif, Mir208b, Myc, Nr1d2, Nupr1, Pi16, Pik3r1, Pou4f1, Rcan1, Scx, Sdc1, Sox9, Tcap, Twist1, Usp2, Wnt2, Xirp2]                                                                                                                                                                                                                                                                                         |
| GO:0061448 | connective tissue development                           | 24 | 10,572687 | 9,48E-09 | [Acan, Cbs, Col11a1, Col1a1, Col5a1, Ctgf, Cyr61, Dgat2, Fgf18, Fgf6, Foxc2, Igf1, Itgb3, Loxl3, Mgp, Prrx2, Pthlh, Scx, Sfrp2, Sh3pxd2b, Snai1, Sox9, Tgfb2, Zbtb16]                                                                                                                                                                                                                                                                                                                                                                       |
| GO:0070838 | divalent metal ion transport                            | 21 | 5,159705  | 7,02E-04 | [Ace, Cacnb1, Cacng6, Ctgf, Drd1, Gnao1, Gpr39, Igf1, Itgb3, Kcne1, Nppa, Oprd1, Orai2, Panx1, Plcg2, Ptgs2, Rgn, Slc39a8, Slc8a2, Snca, Tgfb2]                                                                                                                                                                                                                                                                                                                                                                                             |



|            |                                                          |    |           |          |                                                                                                                                                                                                                                                                                                                                                                                                                                                     |
|------------|----------------------------------------------------------|----|-----------|----------|-----------------------------------------------------------------------------------------------------------------------------------------------------------------------------------------------------------------------------------------------------------------------------------------------------------------------------------------------------------------------------------------------------------------------------------------------------|
| GO:0071345 | cellular response to cytokine stimulus                   | 21 | 5,0119333 | 3,45E-04 | [Angpt1, Ankrd1, Aqp4, Ccl2, Ccl2, Cx3cl1, Cxcr6, Ecm1, Ereg, Fn1, Lepr, Nfil3, Plvap, Ptpn, Rps6ka5, Sfrp1, Sh2b2, Slc26a6, Slc27a1, Star, Tnfsf18]                                                                                                                                                                                                                                                                                                |
| GO:0071363 | cellular response to growth factor stimulus              | 25 | 6,4267354 | 3,79E-05 | [Adamts3, Adamts2, Angpt1, Ankrd1, Bex1, Ccl2, Col1a2, Col3a1, Ctgf, Dok5, Egr, Egr3, Fbn1, Fbn2, Fgf18, Fgf6, Fgf7, Has1, Hspb1, Ngfr, Runx1, Sfrp1, Sox9, Sparc, Tgfb2]                                                                                                                                                                                                                                                                           |
| GO:0071417 | cellular response to organonitrogen compound             | 28 | 6,8292685 | 3,46E-06 | [Blk, Col16a1, Col1a1, Col1a2, Col3a1, Col4a1, Col5a2, Col6a1, Drd1, Egr, Egr2, Egr3, Enpp1, Foxc2, Gck, Irs3, Mmp2, Mmp3, Neurl1a, Ngfr, Pdgfc, Pik3r1, Ptpn, Sfrp1, Sh2b2, Slc25a33, Slc26a6, Sox9]                                                                                                                                                                                                                                               |
| GO:0071495 | cellular response to endogenous stimulus                 | 49 | 5,632184  | 5,61E-08 | [Adamts2, Ankrd1, Blk, Ccl2, Col16a1, Col1a1, Col1a2, Col3a1, Col4a1, Col5a2, Col6a1, Ctgf, Drd1, Egr, Egr2, Egr3, Enpp1, Fbn1, Fbn2, Fgf18, Fgf6, Fgf7, Foxc2, Gck, Gpr22, Has1, Irs3, Klf9, Lepr, Mmp2, Mmp3, Neurl1a, Ngfr, Npc1, Nr1d1, Nr1d2, Nr3c2, Nr5a1, Pdgfc, Pik3r1, Ptpn, Runx1, Sfrp1, Sh2b2, Slc25a33, Slc26a6, Slc27a1, Sox9, Tgfb2]                                                                                                 |
| GO:0072358 | cardiovascular system development                        | 62 | 6,8508286 | 7,81E-14 | [Ace, Adam19, Aldh1a2, Amot, Angpt1, Ankrd1, Ccl11, Ccl2, Col11a1, Col1a1, Col1a2, Col3a1, Col4a1, Col5a1, Col8a1, Col8a2, Ctgf, Cx3cl1, Cyp1b1, Cyr61, Dsg2, Ecm1, Egr3, Erbb4, Ereg, Esm1, Fbn1, Fgf18, Fgf6, Fn1, Foxc2, Foxs1, Hif3a, Hspb1, Igf1, Itgb3, Lepr, Lif, Lox, Loxl3, Mmp2, Otulin, Pi16, Pou4f1, Prrx2, Ptgs2, Runx1, Scx, Serpinf1, Sfrp2, Sh3pxd2b, Snai1, Sox9, Sparc, Srxp2, Tcap, Tgfb2, Tnfrsf12a, Tnmd, Twist1, Wnt2, Xirp2] |
| GO:1901700 | response to oxygen-containing compound                   | 61 | 5,1217465 | 2,04E-08 | [Ace, Adam19, Adh1, Aldob, Ankrd1, Aqp4, Blk, Cbs, Ccl2, Col16a1, Col1a1, Col1a2, Col3a1, Col4a1, Col5a2, Col6a1, Cry2, Cyp1b1, Dgat2, Drd1, Egr, Egr2, Egr3, Enpp1, Foxc2, Gck, Gpr22, Gpr39, Hsph1, Irs3, Klf9, Mmp2, Mmp3, Neurl1a, Ngfr, Nlrc3, Nnat, Nr1d1, Panx1, Pdgfc, Per1, Pik3r1, Pim3, Plcg2, Ptgs2, Ptpn, Ptpn, Pycr1, Rgn, Runx1, Sfrp1, Sh2b2, Slc25a33, Slc26a6, Slc27a1, Snca, Sox9, Spon2, Tgfb2, Tnip3, Ucp3]                    |
| GO:1901701 | cellular response to oxygen-containing compound          | 42 | 5,172414  | 5,88E-06 | [Ankrd1, Aqp4, Blk, Ccl2, Col16a1, Col1a1, Col1a2, Col3a1, Col4a1, Col5a2, Col6a1, Cyp1b1, Dgat2, Drd1, Egr, Egr2, Egr3, Enpp1, Foxc2, Gck, Gpr39, Hsph1, Irs3, Klf9, Mmp2, Mmp3, Neurl1a, Ngfr, Nr1d1, Pdgfc, Pik3r1, Pim3, Ptpn, Pycr1, Rgn, Sfrp1, Sh2b2, Slc25a33, Slc26a6, Sox9, Spon2, Tnip3]                                                                                                                                                 |
| GO:1902532 | negative regulation of intracellular signal transduction | 22 | 5,6847544 | 4,10E-04 | [Arntl, Creb3l1, Dusp7, Fbp2, Herpud1, Hspb1, Hsph1, Igf1, Lif, Mmp3, Myoc, Nlrc3, Per1, Prnp, Rgs2, Sfrp1, Sfrp2, Snai1, Tbc1d10c, Tnip3, Twist1, Wnk2]                                                                                                                                                                                                                                                                                            |
| GO:2000026 | regulation of multicellular organismal development       | 89 | 5,3102627 | 1,76E-13 | [Ace, Adamts20, Amot, Ankrd1, Arntl, Atp8a2, Bex1, Ccl11, Ccl2, Cd276, Cenpf, Col1a1, Col3a1, Col5a1, Col5a2, Colq, Corin, Ctgf, Cthrc1, Ctl4a, Cx3cl1, Cyp1b1, Cyr61, Dixdc1, Dpysl3, Ecm1, Egr3, Erbb4, Etv4, Fbn2, Fgf18, Fgf7, Fn1, Foxc2, Fst, Fstl3, Gdf6, Hspb1, Igf1, Inpp5j, Itgb3, Kctd11, Leo1, Lif, Loxl3, Lrp8, Lrrn1, Mgp, Myc, Neurl1a, Ngef, Ngfr, Nr1d2, Nr5a1, Nupr1, Pi16,                                                       |

## Supplemental Data, Page 26

|                  |                                             |    |           |          |                                                                                                                                                                                                                                                                                                                                                  |
|------------------|---------------------------------------------|----|-----------|----------|--------------------------------------------------------------------------------------------------------------------------------------------------------------------------------------------------------------------------------------------------------------------------------------------------------------------------------------------------|
|                  |                                             |    |           |          | Pik3r1, Pou4f1, Ptgs2, Pthlh, Ptn, Pvr1, Rbp1, Rgn, Runx1, Scx, Serpinf1, Sfrp1, Sfrp2, Shank1, Slitrk2, Snai1, Sox9, Sparc, Srp2, Star, Syndig1, Tg, Tgfb2, Timp1, Tnfrsf11b, Tnfrsf12a, Tnmd, Tob2, Twist1, Usp2, Vwc2, Wnt2, Zbtb16]                                                                                                          |
| GO:2000147       | positive regulation of cell motility        | 37 | 10,081744 | 6.50E-13 | [Amot, Angpt1, Ccl11, Ccl2, Ccl21a, Col1a1, Cx3cl1, Cyp1b1, Cyr61, Drd1, Edn3, Egfr, Erbb4, Fgf18, Fgf7, Fn1, Foxc2, Hspb1, Igf1, Itgb3, Lrrc15, Mmp14, Mmp2, Mmp3, Myoc, Pik3r1, Pivap, Ptgs2, Rras2, Snai1, Sox9, Sparc, Srp2, Tgfb2, Thbs4, Twist1, Wnt5b]                                                                                    |
| REACTOME:5991414 | Extracellular matrix organization           | 46 | 18,93004  | 6.66E-28 | [Adamts3, Adamts4, Bgn, Col11a1, Col15a1, Col16a1, Col1a1, Col1a2, Col22a1, Col26a1, Col3a1, Col4a1, Col4a4, Col5a1, Col5a2, Col5a3, Col6a1, Col6a2, Col6a3, Col8a1, Col8a2, Col9a2, Ctsk, Eln, Fbn1, Fbn2, Fn1, Itga11, Itga9, Itgb3, Lamc3, Loxl1, Mfap4, Mfap5, Mmp14, Mmp2, Mmp3, P3h2, Pcolce, Sdc1, Sparc, Tgfb2, Timp1, Tli2, Tnc, Tpsb2] |
| REACTOME:5992182 | Collagen formation                          | 25 | 35,714287 | 3.08E-22 | [Adamts3, Col11a1, Col15a1, Col16a1, Col1a1, Col1a2, Col22a1, Col26a1, Col3a1, Col4a1, Col4a4, Col5a1, Col5a2, Col5a3, Col6a1, Col6a2, Col6a3, Col8a1, Col8a2, Col9a2, Loxl1, Mmp3, P3h2, Pcolce, Tli2]                                                                                                                                          |
| REACTOME:5992212 | Collagen biosynthesis and modifying enzymes | 22 | 39,285713 | 1.43E-20 | [Adamts3, Col11a1, Col15a1, Col16a1, Col1a1, Col1a2, Col22a1, Col26a1, Col3a1, Col4a1, Col4a4, Col5a1, Col5a2, Col5a3, Col6a1, Col6a2, Col6a3, Col8a1, Col8a2, Col9a2, P3h2, Pcolce]                                                                                                                                                             |

**Supplemental Table 3:** Top 100 differentially regulated genes in the transcriptomes of D2-TAC (n=3) vs. D2-shunt mice (n=5).

| <b>gene name</b> | <b>baseMean</b> | <b>log2FoldChange</b> | <b>padj</b> |
|------------------|-----------------|-----------------------|-------------|
| Syndig1          | 110             | -3,54                 | 4,81E-34    |
| Ankrd1           | 73432           | -2,64                 | 5,92E-44    |
| Rcan1            | 7109            | -2,60                 | 4,15E-39    |
| Crlf1            | 187             | -2,57                 | 2,72E-14    |
| Adamts4          | 116             | -2,55                 | 2,08E-13    |
| Egr2             | 90              | -2,47                 | 2,70E-15    |
| Tgfb2            | 816             | -2,15                 | 6,63E-23    |
| Prrx2            | 29              | -2,14                 | 1,60E-11    |
| Frem1            | 103             | -2,12                 | 1,08E-10    |
| Foxs1            | 186             | -2,09                 | 5,80E-18    |
| Npas2            | 185             | -2,03                 | 6,32E-13    |
| Nlrc3            | 236             | -1,93                 | 7,29E-12    |
| Srpx             | 183             | -1,92                 | 1,29E-13    |
| Nfil3            | 815             | -1,85                 | 9,78E-34    |
| Col1a1           | 12542           | -1,80                 | 3,88E-10    |
| Xirp2            | 34562           | -1,75                 | 5,51E-18    |
| Fhl1             | 16571           | -1,72                 | 2,51E-10    |
| Sh2d4a           | 470             | -1,71                 | 3,04E-12    |
| Cpxm1            | 362             | -1,70                 | 7,17E-19    |
| Mmp14            | 889             | -1,65                 | 3,51E-12    |
| Igf2bp2          | 166             | -1,63                 | 2,29E-15    |
| Adam19           | 1489            | -1,62                 | 3,28E-13    |
| Lhfpl2           | 408             | -1,59                 | 2,24E-13    |
| Ankrd23          | 20717           | -1,54                 | 1,78E-11    |
| Hspb1            | 2073            | -1,54                 | 4,09E-23    |
| Ckap4            | 2009            | -1,51                 | 5,85E-13    |
| Creb3l1          | 281             | -1,48                 | 4,91E-13    |
| Fam198b          | 3049            | -1,47                 | 1,12E-22    |
| Hsph1            | 1758            | -1,44                 | 8,98E-19    |
| Enah             | 6197            | -1,44                 | 7,83E-17    |
| Cyr61            | 1951            | -1,41                 | 2,27E-10    |
| Uck2             | 1001            | -1,37                 | 3,63E-10    |
| Lmcd1            | 1490            | -1,37                 | 2,81E-15    |
| P4ha1            | 2373            | -1,35                 | 1,26E-19    |

|               |       |       |          |
|---------------|-------|-------|----------|
| Ccdc136       | 178   | -1,34 | 2,54E-10 |
| Bace2         | 299   | -1,31 | 7,27E-14 |
| Atp8a2        | 336   | -1,29 | 4,39E-10 |
| Dynll1        | 1167  | -1,26 | 6,23E-10 |
| Igfbp6        | 459   | -1,20 | 3,77E-10 |
| Dpysl3        | 4978  | -1,18 | 2,94E-14 |
| Mmp2          | 4785  | -1,18 | 4,23E-10 |
| Tspan9        | 4893  | -1,17 | 1,29E-11 |
| Sorbs2        | 21154 | -1,14 | 1,31E-15 |
| Vwa1          | 783   | -1,10 | 1,36E-10 |
| Rasl11b       | 1760  | -1,07 | 9,43E-12 |
| Rras2         | 2098  | -1,07 | 8,84E-18 |
| Prnp          | 6810  | -1,07 | 3,84E-12 |
| Inpp5j        | 1120  | -1,06 | 2,04E-20 |
| Des           | 81633 | -1,00 | 1,45E-11 |
| Egflam        | 824   | 1,03  | 1,64E-16 |
| Fam214a       | 889   | 1,03  | 4,83E-19 |
| Cacng6        | 415   | 1,04  | 9,94E-11 |
| Dsg2          | 2199  | 1,05  | 1,01E-12 |
| Ppat          | 1221  | 1,05  | 7,47E-20 |
| Abcd2         | 396   | 1,05  | 3,62E-10 |
| Dusp7         | 1412  | 1,06  | 2,99E-10 |
| Gm16793       | 188   | 1,06  | 6,33E-10 |
| Slc26a6       | 448   | 1,07  | 4,54E-10 |
| Kcnd2         | 1080  | 1,11  | 1,16E-10 |
| Emilin2       | 713   | 1,11  | 1,75E-13 |
| Ccr12         | 361   | 1,12  | 2,85E-11 |
| 9030617O03Rik | 1318  | 1,15  | 2,34E-23 |
| Nr3c2         | 1369  | 1,17  | 2,81E-15 |
| Klf9          | 3199  | 1,18  | 3,36E-14 |
| Pla2g5        | 997   | 1,19  | 1,04E-21 |
| Slc27a1       | 4585  | 1,22  | 8,66E-19 |
| Pdp2          | 553   | 1,25  | 7,06E-13 |
| Gpt2          | 2050  | 1,26  | 6,92E-21 |
| Tll1          | 2360  | 1,26  | 4,31E-14 |
| Ppp1r3a       | 6765  | 1,26  | 1,04E-10 |
| Kcnj3         | 1967  | 1,26  | 4,07E-10 |
| Sned1         | 311   | 1,29  | 2,21E-12 |
| Adamts3       | 291   | 1,31  | 3,64E-10 |
| Stard3        | 1202  | 1,32  | 3,46E-24 |
| Art5          | 876   | 1,32  | 3,15E-11 |

|               |       |      |          |
|---------------|-------|------|----------|
| Tnfaip8       | 1380  | 1,33 | 1,37E-14 |
| Rgs2          | 1660  | 1,35 | 8,60E-13 |
| Pik3r1        | 5955  | 1,39 | 3,89E-14 |
| Gpcpd1        | 7375  | 1,45 | 3,76E-27 |
| Lamb3         | 540   | 1,46 | 1,52E-14 |
| Cry2          | 1217  | 1,48 | 7,83E-16 |
| Npc1          | 2678  | 1,51 | 4,32E-62 |
| Tcap          | 55452 | 1,51 | 2,23E-12 |
| A930018M24Rik | 489   | 1,55 | 1,06E-17 |
| Mettl20       | 607   | 1,55 | 1,52E-11 |
| Mir208b       | 99    | 1,58 | 2,38E-10 |
| Usp2          | 4454  | 1,65 | 1,16E-13 |
| 1110034G24Rik | 1259  | 1,72 | 6,05E-21 |
| Rasd2         | 224   | 1,75 | 1,78E-11 |
| Pfkfb1        | 134   | 1,81 | 1,16E-15 |
| Aqp4          | 199   | 1,84 | 2,29E-17 |
| Clcn1         | 201   | 1,88 | 2,22E-10 |
| Slc16a7       | 590   | 1,88 | 6,46E-21 |
| Tef           | 5424  | 1,90 | 1,88E-14 |
| Lgals4        | 105   | 1,93 | 2,59E-16 |
| Klhl33        | 416   | 2,07 | 1,34E-24 |
| Hlf           | 1334  | 2,12 | 3,11E-16 |
| Fbp2          | 265   | 2,15 | 5,24E-26 |
| Nr1d2         | 3882  | 2,25 | 6,36E-36 |
| Dbp           | 2624  | 3,75 | 3,36E-47 |
